# Supplementary material for: Multiple strain analysis of Streptomyces species from Philippine marine sediments reveals intraspecies heterogeneity in antibiotic activities
Source: PubMed Central journal article supplement (PMC8413401; doi:10.1038/s41598-021-96886-4), 2021-09-02
Supplement: 41598_2021_96886_MOESM1_ESM.pdf [file 41598_2021_96886_MOESM1_ESM.pdf]

# Multiple Strain Analysis of *Streptomyces* species from Philippine Marine Sediments Reveals Intraspecies Heterogeneity in Antibiotic Activities

Chuckcris P. Tenebro<sup>1</sup>, Dana Joanne Von L. Trono<sup>1</sup>, Carmela Vannette B. Vicera<sup>2</sup>, Edna M. Sabido<sup>2</sup>, Jovito A. Ysulat, Jr.<sup>1</sup>, Aaron Joseph M. Macaspac<sup>1</sup>, Kimberly Tampus<sup>1</sup>, Trisha Alexis Fabrigar<sup>1</sup>, Jonel P. Saludes<sup>2,3,5</sup> and Doralyn S. Dalisay<sup>1,4,5,\*</sup>

<sup>1</sup> Center for Chemical Biology and Biotechnology (C2B2), University of San Agustin  
Iloilo City 5000, Philippines

<sup>2</sup> Center for Natural Drug Discovery and Development (CND3), University of San Agustin, Iloilo City 5000, Philippines

<sup>3</sup> Department of Chemistry, College of Liberal Arts, Sciences, and Education, University of San Agustin, Iloilo City 5000, Philippines

<sup>4</sup> Department of Biology, College of Liberal Arts, Sciences, and Education, University of San Agustin, Iloilo City 5000, Philippines

<sup>5</sup> Balik Scientist Program, Philippine Council for Health Research and Development (PCHRD), Department of Science and Technology, Bicutan, Taguig City, 1631, Philippines

\* Correspondence: ddalisay@usa.edu.ph Tel. no. +63-33-5010350

## SUPPLEMENTAL INFORMATION

**Supplementary Table S1.** Degenerate Primers Used to Amplify Polyketide Synthase (PKS) and Non-Ribosomal Peptide Synthetase (NRPS) Domain Fragments.

| Entry | Target Gene for Amplification                                                | Predicted Length (bp) | Primer Name               | Primer Sequence (5' to 3')                                            | References                        |
|-------|------------------------------------------------------------------------------|-----------------------|---------------------------|-----------------------------------------------------------------------|-----------------------------------|
| 1     | Type I polyketide synthase $\beta$ -ketoacyl synthase (KS) domains fragments | 670                   | KS-F<br>KS-R              | CCS CAG SAG CGC<br>STS YTS CTS GA<br>GTS CCS GTS CCG<br>TGS GYS TCS A | Ginolhac <i>et al.</i> , 2005     |
| 2     | Type I polyketide synthase KS domain fragments                               | 700                   | KSMA-F<br>KSMB-R          | TSG CSA TGG ACC<br>CSC AGC AG<br>CCS GTS CCG TGS<br>GCC TCS AC        | Ginolhac <i>et al.</i> , 2005     |
| 3     | Type II polyketide synthases KS $\alpha$ and KS $\beta$ domain fragments     | 800-900               | KS $\alpha$<br>KS $\beta$ | TSG RCT ACR TCA<br>ACG GSC ACG G<br>TAC SAG TCS WTC<br>GCC TGG TTC    | Al-Amoudi <i>et al.</i> , 2016    |
| 4     | Type II polyketide synthases KS $\alpha$ domain fragments                    | 613                   | KS1-F<br>KS1-R            | TSG CST GCT TGG<br>AYG CSA TC<br>TGG AAN CCG CCG<br>AAB CCT CT        | Zothanpuia <i>et al.</i> , 2016   |
| 5     | Type II polyketide synthases at 5' portion of KS $\alpha$ genes              | 554                   | 540F<br>1100R             | GGI TGC ACS TCI<br>GGI MTS GAC<br>CCG ATS GCI CCS<br>AGI GAG TG       | Wawrik <i>et al.</i> , 2005       |
| 6     | NRPS Adenylation domain (AD) fragments                                       | 700                   | A3F<br>A7R                | GCS TAC SYS ATS<br>TAC ACS TCS GG<br>SAS GTC VCC SGT<br>SCG GTA S     | Ayuso-Sacido <i>et al.</i> , 2005 |

Ginolhac, A., Jarrin, C., Robe, P., Perrière, G., Vogel, T. M., Simonet, P. & Nalin, R. Type I polyketide synthases may have evolved through horizontal gene transfer. *J. Mol. Evol.* **60**, 716-25 (2005).

Al-Amoudi, S., Essack, M., Simões, M. F., Bougouffa, S., Soloviev, I., Archer, J. A., Lafi, F. F. & Bajic, V. B., Bioprospecting Red Sea coastal ecosystems for culturable microorganisms and their antimicrobial potential. *Mar. Drugs.* **14**, 165 (2016).

Zothanpuia, Passari, A. K., Gupta, V. K. & Singh, B. P. Detection of antibiotic-resistant bacteria endowed with antimicrobial activity from a freshwater lake and their phylogenetic affiliation. *PeerJ* **4**, e2103 (2016).

Wawrik, B., Kerkhof, L., Zylstra, G. J. & Kukor, J. J. Identification of unique type ii polyketide synthase genes in soil. *Appl. Environ. Microbiol.* **71**, 2232 (2005).

Ayuso-Sacido, A.; Genilloud, O., New PCR Primers for the screening of NRPS and PKS-I systems in Actinomycetes: Detection and distribution of these biosynthetic gene sequences in major taxonomic groups. *Microb. Ecol.* **49**, 10-24 (2005).

**Supplementary Table S2.** Collection Sites of Marine Sediment Collection, Date of Collection and Coordinates.

| <b>Entry</b> | <b>Collection Site</b>     | <b>Date of Collection</b> | <b>Coordinates</b>              |
|--------------|----------------------------|---------------------------|---------------------------------|
| 1            | Southeastern Iloilo site 1 | April, 2017               | 10.3302778 N, 122.5875 E        |
|              | Southeastern Iloilo site 2 | April, 2017               | 10.3275 N, 122.5969444 E        |
| 2            | Southern Antique site 1    | April, 2017               | 10.4191667 N,<br>121.9252778 E  |
|              | Southern Antique site 2    | April, 2017               | 10.41472222 N,<br>121.9380556 E |
| 3            | Western Antique site 1     | April, 2017               | 11.3188889 N,<br>121.6616667 E  |
|              | Western Antique site 2     | April, 2017               | 11.3158333 N, 121.6775 E        |
| 4            | Northern Antique           | April, 2017               | 11.41722222 N,<br>122.0288889 E |
| 5            | Northwestern Antique       | April, 2017               | 11.4763889 N,<br>121.9316667 E  |
| 6            | Negros Occidental          | May, 2017                 | 9.87222222 N,<br>122.3769444 E  |
| 7            | Negros Oriental            | May, 2017                 | 9.086218 N, 123.2688889 E       |
| 8            | Central Visayas            | May, 2017                 | 9.43222222 N,<br>123.3891667 E  |
| 9            | South Central Visayas      | May, 2017                 | 9.51666667 N,<br>123.7119444 E  |
| 10           | Occidental Mindoro site 1  | March, 2018               | 12.665 N, 120.4119444 E         |
|              | Occidental Mindoro site 2  | March, 2018               | 12.65833333 N,<br>120.4130556 E |
| 11           | Tubbataha Reefs site 1     | April, 2018               | 8.88861111 N,<br>119.9666667 E  |
|              | Tubbataha Reefs site 2     | April, 2018               | 8.74 N, 119.8191667 E           |

**Supplementary Table S3.** Distance of Sampling Sites from the Mainland and Marine Sediment Sample Description.

| <b>Entry</b> | <b>Sampling Location</b> | <b>Distance from mainland (m)</b> | <b>Number of sediment cores sampled</b> | <b>Marine Sediments Characteristics</b>                                                         |
|--------------|--------------------------|-----------------------------------|-----------------------------------------|-------------------------------------------------------------------------------------------------|
| 1            | Southeastern Iloilo      | 1000                              | 2                                       | Coarse mixture of muddy sand and pebbles                                                        |
| 2            | Southern Antique         | 250                               | 2                                       | Fine to coarse grains of ash gray sand                                                          |
| 3            | Western Antique          | 700                               | 2                                       | White grains of sand and coral patches                                                          |
| 4            | Northern Antique         | 400                               | 2                                       | Fine white grains of sand, small pebbles, and tiny pieces of broken corals                      |
| 5            | Northwestern Antique     | 200                               | 1                                       | Fine white grains of sand, small pebbles, and tiny pieces of broken corals                      |
| 6            | Negros Occidental        | 350                               | 1                                       | Fine to slightly coarse mixture of white grains of sand and small pebbles                       |
| 7            | Negros Oriental          | 200                               | 1                                       | Fine to slightly coarse mixture of white grains of sand and small pebbles                       |
| 8            | Tubbataha Reefs          | 15000                             | 2                                       | Fine to coarse white sediments with red and white patches of corals                             |
| 9            | Central Visayas          | 200                               | 1                                       | Fine to coarse mixture of white grains of sand, small pebbles, and tiny pieces of broken corals |
| 10           | South Central Visayas    | 150                               | 1                                       | Fine to slightly coarse mixture of white grains of sand and small pebbles                       |
| 11           | Occidental Mindoro       | 300                               | 2                                       | Fine grains of white sand with pebbles and coral patches                                        |

**Supplementary Table S4.** Antibacterial and Anticancer Activity Profile of Active *Streptomyces* Strains

| Isolate Code and Positive Control      | 16S rRNA Gene Sequence Match (97 to 99% identity) | Collection Site       | Antibacterial Activities<br>% Growth Inhibition ± SD<br>(conc. of extract = 2.5 mg/ml) |                              |                                    |                                   | Anticancer Activity<br>% cytotoxic activity ± SD<br>(conc. of extract = 400 µg/ml)<br>Ovarian Cancer (A2780) |
|----------------------------------------|---------------------------------------------------|-----------------------|----------------------------------------------------------------------------------------|------------------------------|------------------------------------|-----------------------------------|--------------------------------------------------------------------------------------------------------------|
|                                        |                                                   |                       | <i>S. aureus</i><br>ATCC BAA-44                                                        | <i>E. coli</i><br>ATCC 25922 | <i>P. aeruginosa</i><br>ATCC 27853 | <i>E. aerogenes</i><br>ATCC 13048 |                                                                                                              |
| <i>Streptomyces</i> sp. strain DSD1715 | <i>Streptomyces albus</i>                         | Western Antique       | ---                                                                                    | 80 ± 0.06                    | ---                                | ---                               | ---                                                                                                          |
| <i>Streptomyces</i> sp. strain DSD2595 | <i>Streptomyces cacaoi</i>                        | Tubbataha Reefs       | 95 ± 0.47                                                                              | ---                          | ---                                | ---                               | ---                                                                                                          |
| <i>Streptomyces</i> sp. strain DSD331  | <i>Streptomyces carpaticus</i>                    | Southeastern Iloilo   | 92 ± 0.50                                                                              | ---                          | ---                                | ---                               | ---                                                                                                          |
| <i>Streptomyces</i> sp. strain DSD274  | <i>Streptomyces carpaticus</i>                    | Southeastern Iloilo   | ---                                                                                    | 96 ± 0.19                    | ---                                | ---                               | ---                                                                                                          |
| <i>Streptomyces</i> sp. strain DSD299  | <i>Streptomyces diastaticus</i>                   | Southeastern Iloilo   | 81 ± 0.51                                                                              | ---                          | ---                                | ---                               | ---                                                                                                          |
| <i>Streptomyces</i> sp. strain DSD1886 | <i>Streptomyces diastaticus</i>                   | Negros Occidental     | 89 ± 0.35                                                                              | ---                          | ---                                | ---                               | ---                                                                                                          |
| <i>Streptomyces</i> sp. strain DSD3040 | <i>Streptomyces diastaticus</i>                   | Tubbataha Reefs       | ---                                                                                    | ---                          | 52 ± 0.07                          | ---                               | ---                                                                                                          |
| <i>Streptomyces</i> sp. strain DSD1912 | <i>Streptomyces diastaticus</i>                   | South central Visayas | ---                                                                                    | 75 ± 0.44                    | ---                                | ---                               | ---                                                                                                          |
| <i>Streptomyces</i> sp. strain DSD1631 | <i>Streptomyces diastaticus</i>                   | Negros Occidental     | 75 ± 3.26                                                                              | ---                          | ---                                | ---                               | ---                                                                                                          |
| <i>Streptomyces</i> sp. strain DSD133  | <i>Streptomyces ennissocaesilis</i>               | Southeastern Iloilo   | 93 ± 0.54                                                                              | ---                          | ---                                | ---                               | ---                                                                                                          |

| Isolate Code and Positive Control      | 16S rRNA Gene Sequence Match (97 to 99% identity) | Collection Site     | Antibacterial Activities<br>% Growth Inhibition $\pm$ SD<br>(conc. of extract = 2.5 mg/ml) |                              |                                    |                                   | Anticancer Activity<br>% cytotoxic activity $\pm$ SD<br>(conc. of extract = 400 $\mu$ g/ml)<br>Ovarian Cancer (A2780) |
|----------------------------------------|---------------------------------------------------|---------------------|--------------------------------------------------------------------------------------------|------------------------------|------------------------------------|-----------------------------------|-----------------------------------------------------------------------------------------------------------------------|
|                                        |                                                   |                     | <i>S. aureus</i><br>ATCC BAA-44                                                            | <i>E. coli</i><br>ATCC 25922 | <i>P. aeruginosa</i><br>ATCC 27853 | <i>E. aerogenes</i><br>ATCC 13048 |                                                                                                                       |
| <i>Streptomyces</i> sp. strain DSD164  | <i>Streptomyces ennissocaesilis</i>               | Southern Antique    | 92 $\pm$ 0.45                                                                              | ---                          | ---                                | ---                               | ---                                                                                                                   |
| <i>Streptomyces</i> sp. strain DSD165  | <i>Streptomyces ennissocaesilis</i>               | Southern Antique    | 96 $\pm$ 0.53                                                                              | ---                          | ---                                | ---                               | ---                                                                                                                   |
| <i>Streptomyces</i> sp. strain DSD294  | <i>Streptomyces ennissocaesilis</i>               | Southeastern Iloilo | 94 $\pm$ 0.50                                                                              | ---                          | ---                                | ---                               | ---                                                                                                                   |
| <i>Streptomyces</i> sp. strain DSD318  | <i>Streptomyces ennissocaesilis</i>               | Southeastern Iloilo | ---                                                                                        | 74 $\pm$ 2.25                | 89 $\pm$ 6.71                      | ---                               | ---                                                                                                                   |
| <i>Streptomyces</i> sp. strain DSD322  | <i>Streptomyces ennissocaesilis</i>               | Southern Antique    | 52 $\pm$ 2.03                                                                              | ---                          | ---                                | ---                               | 72 $\pm$ 0.16                                                                                                         |
| <i>Streptomyces</i> sp. strain DSD357  | <i>Streptomyces ennissocaesilis</i>               | Southern Antique    | 94 $\pm$ 3.18                                                                              | ---                          | ---                                | ---                               | ---                                                                                                                   |
| <i>Streptomyces</i> sp. strain DSD360  | <i>Streptomyces ennissocaesilis</i>               | Southern Antique    | 95 $\pm$ 1.13                                                                              | 86 $\pm$ 0.84                | ---                                | ---                               | ---                                                                                                                   |
| <i>Streptomyces</i> sp. strain DSD800  | <i>Streptomyces ennissocaesilis</i>               | Western Antique     | 94 $\pm$ 0.16                                                                              | ---                          | ---                                | ---                               | ---                                                                                                                   |
| <i>Streptomyces</i> sp. strain DSD998  | <i>Streptomyces ennissocaesilis</i>               | Western Antique     | 86 $\pm$ 3.64                                                                              | ---                          | ---                                | ---                               | 51 $\pm$ 0.10                                                                                                         |
| <i>Streptomyces</i> sp. strain DSD1986 | <i>Streptomyces ennissocaesilis</i>               | Western Antique     | 97 $\pm$ 0.16                                                                              | ---                          | ---                                | ---                               | ---                                                                                                                   |

| Isolate Code and Positive Control      | 16S rRNA Gene Sequence Match (97 to 99% identity) | Collection Site       | Antibacterial Activities<br>% Growth Inhibition ± SD<br>(conc. of extract = 2.5 mg/ml) |                              |                                    |                                   | Anticancer Activity<br>% cytotoxic activity ± SD<br>(conc. of extract = 400 µg/ml)<br>Ovarian Cancer (A2780) |
|----------------------------------------|---------------------------------------------------|-----------------------|----------------------------------------------------------------------------------------|------------------------------|------------------------------------|-----------------------------------|--------------------------------------------------------------------------------------------------------------|
|                                        |                                                   |                       | <i>S. aureus</i><br>ATCC BAA-44                                                        | <i>E. coli</i><br>ATCC 25922 | <i>P. aeruginosa</i><br>ATCC 27853 | <i>E. aerogenes</i><br>ATCC 13048 |                                                                                                              |
| <i>Streptomyces</i> sp. strain DSD775  | <i>Streptomyces ennissocaesilis</i>               | North western Antique | 79 ± 5.13                                                                              | ---                          | ---                                | ---                               |                                                                                                              |
| <i>Streptomyces</i> sp. strain DSD476  | <i>Streptomyces geysiriensis</i>                  | Southern Antique      | 91 ± 0.10                                                                              | ---                          | ---                                | ---                               |                                                                                                              |
| <i>Streptomyces</i> sp. strain DSD176  | <i>Streptomyces geysiriensis</i>                  | Southern Antique      | 92 ± 1.40                                                                              | ---                          | ---                                | ---                               |                                                                                                              |
| <i>Streptomyces</i> sp. strain DSD342  | <i>Streptomyces geysiriensis</i>                  | Southeastern Iloilo   | 56 ± 10.62                                                                             | ---                          | ---                                | 64 ± 0.02                         |                                                                                                              |
| <i>Streptomyces</i> sp. strain DSD767  | <i>Streptomyces griseorubens</i>                  | North western Antique | ---                                                                                    | ---                          | 96 ± 1.16                          | 68 ± 0.02                         |                                                                                                              |
| <i>Streptomyces</i> sp. strain DSD757  | <i>Streptomyces harbinensis</i>                   | Southern Antique      | 95 ± 0.16                                                                              | ---                          | ---                                | ---                               |                                                                                                              |
| <i>Streptomyces</i> sp. strain DSD954  | <i>Streptomyces harbinensis</i>                   | Northern Antique      | 77 ± 6.16                                                                              | ---                          | ---                                | ---                               |                                                                                                              |
| <i>Streptomyces</i> sp. strain DSD251  | <i>Streptomyces kunmingensis</i>                  | Southern Antique      | 59 ± 2.71                                                                              | ---                          | ---                                | 61 ± 0.05                         |                                                                                                              |
| <i>Streptomyces</i> sp. strain DSD250  | <i>Streptomyces kunmingensis</i>                  | Southern Antique      | 60 ± 4.77                                                                              | 59 ± 6.15                    | ---                                | 58 ± 0.02                         |                                                                                                              |
| <i>Streptomyces</i> sp. strain DSD1764 | <i>Streptomyces kunmingensis</i>                  | Northern Antique      | 62 ± 2.83                                                                              | ---                          | ---                                | 73 ± 0.04                         |                                                                                                              |

| Isolate Code and Positive Control      | 16S rRNA Gene Sequence Match (97 to 99% identity) | Collection Site     | Antibacterial Activities<br>% Growth Inhibition ± SD<br>(conc. of extract = 2.5 mg/ml) |                              |                                    |                                   | Anticancer Activity<br>% cytotoxic activity ± SD<br>(conc. of extract = 400 µg/ml)<br>Ovarian Cancer (A2780) |
|----------------------------------------|---------------------------------------------------|---------------------|----------------------------------------------------------------------------------------|------------------------------|------------------------------------|-----------------------------------|--------------------------------------------------------------------------------------------------------------|
|                                        |                                                   |                     | <i>S. aureus</i><br>ATCC BAA-44                                                        | <i>E. coli</i><br>ATCC 25922 | <i>P. aeruginosa</i><br>ATCC 27853 | <i>E. aerogenes</i><br>ATCC 13048 |                                                                                                              |
| <i>Streptomyces</i> sp. strain DSD1804 | <i>Streptomyces kunmingensis</i>                  | Northern Antique    | 57 ± 2.21                                                                              | ---                          | ---                                | ---                               | 52 ± 0.10                                                                                                    |
| <i>Streptomyces</i> sp. strain DSD3034 | <i>Streptomyces mutabilis</i>                     | Tubbataha Reefs     | 64 ± 6.85                                                                              | ---                          | ---                                | ---                               | ---                                                                                                          |
| <i>Streptomyces</i> sp. strain DSD3030 | <i>Streptomyces mutabilis</i>                     | Tubbataha Reefs     | 98 ± 0.11                                                                              | ---                          | ---                                | ---                               | ---                                                                                                          |
| <i>Streptomyces</i> sp. strain DSD3047 | <i>Streptomyces mutabilis</i>                     | Tubbataha Reefs     | 96 ± 0.08                                                                              | 69 ± 8.64                    | ---                                | ---                               | ---                                                                                                          |
| <i>Streptomyces</i> sp. strain DSD2610 | <i>Streptomyces mutabilis</i>                     | Tubbataha Reefs     | 93 ± 1.50                                                                              | ---                          | ---                                | ---                               | ---                                                                                                          |
| <i>Streptomyces</i> sp. strain DSD2613 | <i>Streptomyces mutabilis</i>                     | Tubbataha Reefs     | 95 ± 2.36                                                                              | ---                          | ---                                | ---                               | ---                                                                                                          |
| <i>Streptomyces</i> sp. strain DSD2594 | <i>Streptomyces mutabilis</i>                     | Tubbataha Reefs     | ---                                                                                    | ---                          | 55 ± 0.07                          | ---                               | ---                                                                                                          |
| <i>Streptomyces</i> sp. strain DSD264  | <i>Streptomyces olivaceus</i>                     | Southern Antique    | ---                                                                                    | 82 ± 1.56                    | ---                                | ---                               | ---                                                                                                          |
| <i>Streptomyces</i> sp. strain DSD618  | <i>Streptomyces olivaceus</i>                     | Southeastern Iloilo | 99 ± 0.10                                                                              | ---                          | ---                                | ---                               | ---                                                                                                          |
| <i>Streptomyces</i> sp. strain DSD3049 | <i>Streptomyces olivaceus</i>                     | Occidental Mindoro  | ---                                                                                    | ---                          | 52 ± 1.48                          | ---                               | ---                                                                                                          |
| <i>Streptomyces</i> sp. strain DSD982  | <i>Streptomyces parvulus</i>                      | Negros Oriental     | 84 ± 0.33                                                                              | 74 ± 1.33                    | ---                                | ---                               | 62 ± 0.09                                                                                                    |



| Isolate Code and Positive Control      | 16S rRNA Gene Sequence Match (97 to 99% identity) | Collection Site       | Antibacterial Activities<br>% Growth Inhibition $\pm$ SD<br>(conc. of extract = 2.5 mg/ml) |                              |                                    |                                   | Anticancer Activity<br>% cytotoxic activity $\pm$ SD<br>(conc. of extract = 400 $\mu$ g/ml)<br>Ovarian Cancer (A2780) |
|----------------------------------------|---------------------------------------------------|-----------------------|--------------------------------------------------------------------------------------------|------------------------------|------------------------------------|-----------------------------------|-----------------------------------------------------------------------------------------------------------------------|
|                                        |                                                   |                       | <i>S. aureus</i><br>ATCC BAA-44                                                            | <i>E. coli</i><br>ATCC 25922 | <i>P. aeruginosa</i><br>ATCC 27853 | <i>E. aerogenes</i><br>ATCC 13048 |                                                                                                                       |
| <i>Streptomyces</i> sp. strain DSD1639 | <i>Streptomyces parvulus</i>                      | Negros Occidental     | ---                                                                                        | 92 $\pm$ 0.01                | ---                                | ---                               | 65 $\pm$ 0.05                                                                                                         |
| <i>Streptomyces</i> sp. strain DSD261  | <i>Streptomyces parvulus</i>                      | Southern Antique      | ---                                                                                        | 98 $\pm$ 0.00                | ---                                | ---                               | ---                                                                                                                   |
| <i>Streptomyces</i> sp. strain DSD991  | <i>Streptomyces parvulus</i>                      | Negros Oriental       | 94 $\pm$ 0.54                                                                              | 74 $\pm$ 2.76                | ---                                | ---                               | ---                                                                                                                   |
| <i>Streptomyces</i> sp. strain DSD1719 | <i>Streptomyces parvulus</i>                      | South central Visayas | 93 $\pm$ 0.21                                                                              | ---                          | ---                                | ---                               | ---                                                                                                                   |
| <i>Streptomyces</i> sp. strain DSD292  | <i>Streptomyces parvulus</i>                      | Southern Antique      | ---                                                                                        | 75 $\pm$ 2.11                | ---                                | ---                               | ---                                                                                                                   |
| <i>Streptomyces</i> sp. strain DSD309  | <i>Streptomyces parvulus</i>                      | Southeastern Iloilo   | 72 $\pm$ 1.15                                                                              | 80 $\pm$ 0.53                | ---                                | ---                               | 60 $\pm$ 0.05                                                                                                         |
| <i>Streptomyces</i> sp. strain DSD840  | <i>Streptomyces parvulus</i>                      | Negros Oriental       | 94 $\pm$ 0.79                                                                              | 76 $\pm$ 0.01                | ---                                | ---                               | 81 $\pm$ 0.20                                                                                                         |
| <i>Streptomyces</i> sp. strain DSD1409 | <i>Streptomyces parvulus</i>                      | Western Antique       | ---                                                                                        | 70 $\pm$ 1.20                | ---                                | ---                               | ---                                                                                                                   |
| <i>Streptomyces</i> sp. strain DSD1690 | <i>Streptomyces parvulus</i>                      | Negros Occidental     | 93 $\pm$ 0.51                                                                              | 57 $\pm$ 8.84                | ---                                | ---                               | ---                                                                                                                   |
| <i>Streptomyces</i> sp. strain DSD985  | <i>Streptomyces parvulus</i>                      | Negros Oriental       | 92 $\pm$ 1.67                                                                              | 91 $\pm$ 0.01                | ---                                | ---                               | 55 $\pm$ 0.10                                                                                                         |

| Isolate Code and Positive Control      | 16S rRNA Gene Sequence Match (97 to 99% identity) | Collection Site    | Antibacterial Activities<br>% Growth Inhibition ± SD<br>(conc. of extract = 2.5 mg/ml) |                              |                                    |                                   | Anticancer Activity<br>% cytotoxic activity ± SD<br>(conc. of extract = 400 µg/ml)<br>Ovarian Cancer (A2780) |
|----------------------------------------|---------------------------------------------------|--------------------|----------------------------------------------------------------------------------------|------------------------------|------------------------------------|-----------------------------------|--------------------------------------------------------------------------------------------------------------|
|                                        |                                                   |                    | <i>S. aureus</i><br>ATCC BAA-44                                                        | <i>E. coli</i><br>ATCC 25922 | <i>P. aeruginosa</i><br>ATCC 27853 | <i>E. aerogenes</i><br>ATCC 13048 |                                                                                                              |
| <i>Streptomyces</i> sp. strain DSD481  | <i>Streptomyces parvulus</i>                      | Southern Antique   | 92 ± 0.70                                                                              | 80 ± 0.93                    | ---                                | ---                               | 56 ± 0.04                                                                                                    |
| <i>Streptomyces</i> sp. strain DSD1083 | <i>Streptomyces parvulus</i>                      | Western Antique    | ---                                                                                    | 93 ± 0.19                    | ---                                | ---                               | ---                                                                                                          |
| <i>Streptomyces</i> sp. strain DSD984  | <i>Streptomyces parvulus</i>                      | Negros Oriental    | ---                                                                                    | 63 ± 0.52                    | ---                                | ---                               | 58 ± 0.03                                                                                                    |
| <i>Streptomyces</i> sp. strain DSD992  | <i>Streptomyces parvulus</i>                      | Negros Oriental    | 79 ± 1.19                                                                              | 80 ± 1.38                    | ---                                | ---                               | 71 ± 0.14                                                                                                    |
| <i>Streptomyces</i> sp. strain DSD154  | <i>Streptomyces parvulus</i>                      | Southern Antique   | 81 ± 2.39                                                                              | 67 ± 0.07                    | ---                                | ---                               | ---                                                                                                          |
| <i>Streptomyces</i> sp. strain DSD1636 | <i>Streptomyces parvulus</i>                      | Negros Occidental  | 77 ± 2.64                                                                              | 68 ± 2.32                    | ---                                | ---                               | 54 ± 0.14                                                                                                    |
| <i>Streptomyces</i> sp. strain DSD1641 | <i>Streptomyces parvulus</i>                      | Negros Occidental  | 81 ± 2.35                                                                              | ---                          | ---                                | ---                               | ---                                                                                                          |
| <i>Streptomyces</i> sp. strain DSD1643 | <i>Streptomyces parvulus</i>                      | Negros Occidental  | 68 ± 2.43                                                                              | 85 ± 1.26                    | ---                                | ---                               | ---                                                                                                          |
| <i>Streptomyces</i> sp. strain DSD995  | <i>Streptomyces parvulus</i>                      | Negros Oriental    | 61 ± 0.11                                                                              | 59 ± 0.12                    | ---                                | ---                               | 57 ± 0.04                                                                                                    |
| <i>Streptomyces</i> sp. strain DSD1642 | <i>Streptomyces parvulus</i>                      | Negros Occidental  | 76 ± 0.07                                                                              | ---                          | ---                                | ---                               | 59 ± 0.04                                                                                                    |
| <i>Streptomyces</i> sp. strain DSD3100 | <i>Streptomyces parvulus</i>                      | Occidental Mindoro | 95 ± 1.47                                                                              | ---                          | ---                                | ---                               | ---                                                                                                          |

| Isolate Code and Positive Control      | 16S rRNA Gene Sequence Match (97 to 99% identity) | Collection Site       | Antibacterial Activities<br>% Growth Inhibition ± SD<br>(conc. of extract = 2.5 mg/ml) |                              |                                    |                                   | Anticancer Activity<br>% cytotoxic activity ± SD<br>(conc. of extract = 400 µg/ml)<br>Ovarian Cancer (A2780) |
|----------------------------------------|---------------------------------------------------|-----------------------|----------------------------------------------------------------------------------------|------------------------------|------------------------------------|-----------------------------------|--------------------------------------------------------------------------------------------------------------|
|                                        |                                                   |                       | <i>S. aureus</i><br>ATCC BAA-44                                                        | <i>E. coli</i><br>ATCC 25922 | <i>P. aeruginosa</i><br>ATCC 27853 | <i>E. aerogenes</i><br>ATCC 13048 |                                                                                                              |
| <i>Streptomyces</i> sp. strain DSD1637 | <i>Streptomyces parvulus</i>                      | Negros Occidental     | 96 ± 0.73                                                                              | 94 ± 0.63                    | 64 ± 0.87                          | ---                               | ---                                                                                                          |
| <i>Streptomyces</i> sp. strain DSD1629 | <i>Streptomyces parvulus</i>                      | Negros Occidental     | 92 ± 0.97                                                                              | 94 ± 0.36                    | ---                                | ---                               | 55 ± 0.07                                                                                                    |
| <i>Streptomyces</i> sp. strain DSD988  | <i>Streptomyces parvulus</i>                      | Negros Oriental       | 61 ± 0.18                                                                              | ---                          | ---                                | ---                               | 51 ± 0.06                                                                                                    |
| <i>Streptomyces</i> sp. strain DSD986  | <i>Streptomyces parvulus</i>                      | Negros Oriental       | ---                                                                                    | 55 ± 12.83                   | ---                                | ---                               | 58 ± 0.03                                                                                                    |
| <i>Streptomyces</i> sp. strain DSD993  | <i>Streptomyces parvulus</i>                      | Negros Oriental       | 62 ± 0.09                                                                              | ---                          | ---                                | ---                               | 57 ± 0.02                                                                                                    |
| <i>Streptomyces</i> sp. strain DSD1072 | <i>Streptomyces parvulus</i>                      | Western Antique       | ---                                                                                    | 86 ± 3.06                    | ---                                | ---                               | ---                                                                                                          |
| <i>Streptomyces</i> sp. strain DSD1969 | <i>Streptomyces parvulus</i>                      | South central Visayas | 67 ± 1.49                                                                              | 51 ± 0.08                    | ---                                | ---                               | ---                                                                                                          |
| <i>Streptomyces</i> sp. strain DSD1692 | <i>Streptomyces parvulus</i>                      | Negros Occidental     | 50 ± 0.50                                                                              | ---                          | ---                                | ---                               | 67 ± 0.04                                                                                                    |
| <i>Streptomyces</i> sp. strain DSD1632 | <i>Streptomyces parvulus</i>                      | Negros Occidental     | ---                                                                                    | 70 ± 3.16                    | ---                                | ---                               | 59 ± 0.09                                                                                                    |
| <i>Streptomyces</i> sp. strain DSD1628 | <i>Streptomyces parvulus</i>                      | Negros Occidental     | 85 ± 0.07                                                                              | 85 ± 1.50                    | ---                                | ---                               | 64 ± 0.05                                                                                                    |

| Isolate Code and Positive Control      | 16S rRNA Gene Sequence Match (97 to 99% identity) | Collection Site     | Antibacterial Activities<br>% Growth Inhibition ± SD<br>(conc. of extract = 2.5 mg/ml) |                              |                                    |                                   | Anticancer Activity<br>% cytotoxic activity ± SD<br>(conc. of extract = 400 µg/ml)<br>Ovarian Cancer (A2780) |
|----------------------------------------|---------------------------------------------------|---------------------|----------------------------------------------------------------------------------------|------------------------------|------------------------------------|-----------------------------------|--------------------------------------------------------------------------------------------------------------|
|                                        |                                                   |                     | <i>S. aureus</i><br>ATCC BAA-44                                                        | <i>E. coli</i><br>ATCC 25922 | <i>P. aeruginosa</i><br>ATCC 27853 | <i>E. aerogenes</i><br>ATCC 13048 |                                                                                                              |
| <i>Streptomyces</i> sp. strain DSD2596 | <i>Streptomyces parvulus</i>                      | Occidental Mindoro  | 77 ± 4.14                                                                              | ---                          | ---                                | ---                               | 57 ± 0.05                                                                                                    |
| <i>Streptomyces</i> sp. strain DSD2603 | <i>Streptomyces pseudogriseolus</i>               | Tubbataha Reefs     | 95 ± 0.00                                                                              | ---                          | ---                                | ---                               | ---                                                                                                          |
| <i>Streptomyces</i> sp. strain DSD120  | <i>Streptomyces rochei</i>                        | Southeastern Iloilo | 90 ± 1.24                                                                              | ---                          | ---                                | ---                               | ---                                                                                                          |
| <i>Streptomyces</i> sp. strain DSD243  | <i>Streptomyces rochei</i>                        | Southern Antique    | 86 ± 2.34                                                                              | ---                          | ---                                | ---                               | ---                                                                                                          |
| <i>Streptomyces</i> sp. strain DSD284  | <i>Streptomyces rochei</i>                        | Southern Antique    | 96 ± 0.08                                                                              | ---                          | ---                                | ---                               | 57 ± 0.04                                                                                                    |
| <i>Streptomyces</i> sp. strain DSD323  | <i>Streptomyces rochei</i>                        | Southern Antique    | 89 ± 0.32                                                                              | ---                          | ---                                | ---                               | ---                                                                                                          |
| <i>Streptomyces</i> sp. strain DSD501  | <i>Streptomyces rochei</i>                        | Northern Antique    | 94 ± 1.96                                                                              | ---                          | ---                                | ---                               | 59 ± 0.06                                                                                                    |
| <i>Streptomyces</i> sp. strain DSD839  | <i>Streptomyces rochei</i>                        | Negros Oriental     | ---                                                                                    | 50 ± 0.01                    | ---                                | ---                               | ---                                                                                                          |
| <i>Streptomyces</i> sp. strain DSD1328 | <i>Streptomyces rochei</i>                        | Central Visayas     | 94 ± 0.31                                                                              | ---                          | ---                                | ---                               | 52 ± 0.06                                                                                                    |
| <i>Streptomyces</i> sp. strain DSD1342 | <i>Streptomyces rochei</i>                        | Negros Occidental   | 89 ± 0.39                                                                              | ---                          | ---                                | ---                               | ---                                                                                                          |
| <i>Streptomyces</i> sp. strain DSD1381 | <i>Streptomyces rochei</i>                        | Negros Occidental   | 96 ± 0.64                                                                              | ---                          | ---                                | ---                               | 55 ± 0.09                                                                                                    |

| Isolate Code and Positive Control      | 16S rRNA Gene Sequence Match (97 to 99% identity) | Collection Site    | Antibacterial Activities<br>% Growth Inhibition ± SD<br>(conc. of extract = 2.5 mg/ml) |                              |                                    |                                   | Anticancer Activity<br>% cytotoxic activity ± SD<br>(conc. of extract = 400 µg/ml)<br>Ovarian Cancer (A2780) |
|----------------------------------------|---------------------------------------------------|--------------------|----------------------------------------------------------------------------------------|------------------------------|------------------------------------|-----------------------------------|--------------------------------------------------------------------------------------------------------------|
|                                        |                                                   |                    | <i>S. aureus</i><br>ATCC BAA-44                                                        | <i>E. coli</i><br>ATCC 25922 | <i>P. aeruginosa</i><br>ATCC 27853 | <i>E. aerogenes</i><br>ATCC 13048 |                                                                                                              |
| <i>Streptomyces</i> sp. strain DSD1555 | <i>Streptomyces rochei</i>                        | Negros Oriental    | 96 ± 1.65                                                                              | 66 ± 5.97                    | ---                                | ---                               |                                                                                                              |
| <i>Streptomyces</i> sp. strain DSD2625 | <i>Streptomyces rochei</i>                        | Occidental Mindoro | 67 ± 4.18                                                                              | ---                          | ---                                | ---                               |                                                                                                              |
| <i>Streptomyces</i> sp. strain DSD3018 | <i>Streptomyces sedi</i>                          | Occidental Mindoro | 57 ± 2.74                                                                              | ---                          | ---                                | 71 ± 0.07                         |                                                                                                              |
| <i>Streptomyces</i> sp. strain DSD3011 | <i>Streptomyces sedi</i>                          | Occidental Mindoro | 86 ± 1.82                                                                              | 90 ± 10.9                    | ---                                | ---                               |                                                                                                              |
| <i>Streptomyces</i> sp. strain DSD2987 | <i>Streptomyces sedi</i>                          | Occidental Mindoro | 77 ± 2.88                                                                              | 53 ± 3.52                    | ---                                | ---                               |                                                                                                              |
| <i>Streptomyces</i> sp. strain DSD977  | <i>Streptomyces xiamenensis</i>                   | Western Antique    | 83 ± 0.94                                                                              | ---                          | ---                                | 61 ± 0.07                         |                                                                                                              |
| <i>Streptomyces</i> sp. strain DSD742  | <i>Streptomyces</i> sp. nov.                      | Western Antique    | ---                                                                                    | 100 ± 0.19                   | ---                                | 68 ± 0.02                         |                                                                                                              |
| <i>Streptomyces</i> sp. strain DSD3025 | <i>Streptomyces</i> sp. nov.                      | Tubbataha Reefs    | 97 ± 0.00                                                                              | ---                          | ---                                | ---                               |                                                                                                              |
| <i>Streptomyces</i> sp. strain DSD1006 | <i>Streptomyces</i> sp. nov.                      | Northern Antique   | 92 ± 0.61                                                                              | ---                          | ---                                | ---                               |                                                                                                              |
| Tetracycline (0.25 mg/mL)              |                                                   |                    | 98 ± 0.07                                                                              | 98 ± 0.07                    | 99 ± 0.04                          | 99 ± 0.02                         |                                                                                                              |

---, not active

**Supplementary Table S5.** NCBI GenBank Accession Numbers of 16S rRNA and *rpoB* Gene Sequences

| Streptomyces Strain Code | Collection Site       | 16s rRNA         |               |                                                                                                               | rpoB             |               |                                                                                                               |
|--------------------------|-----------------------|------------------|---------------|---------------------------------------------------------------------------------------------------------------|------------------|---------------|---------------------------------------------------------------------------------------------------------------|
|                          |                       | Accession number | Date Released | Accession URL                                                                                                 | Accession Number | Date Released | Accession URL                                                                                                 |
| <b>DSD1715</b>           | Western Antique       | MW217110         | 03/31/2021    | <a href="https://www.ncbi.nlm.nih.gov/nuccore/MW217110.1">https://www.ncbi.nlm.nih.gov/nuccore/MW217110.1</a> | MW820643         | 07/26/2021    | <a href="https://www.ncbi.nlm.nih.gov/nuccore/MW820643.1">https://www.ncbi.nlm.nih.gov/nuccore/MW820643.1</a> |
| <b>DSD2595</b>           | Tubbataha Reefs       | MW217135         | 03/31/2021    | <a href="https://www.ncbi.nlm.nih.gov/nuccore/MW217135.1">https://www.ncbi.nlm.nih.gov/nuccore/MW217135.1</a> | MW855583         | 07/26/2021    | <a href="https://www.ncbi.nlm.nih.gov/nuccore/MW855583.1">https://www.ncbi.nlm.nih.gov/nuccore/MW855583.1</a> |
| <b>DSD274</b>            | Southeastern Iloilo   | MW217097         | 03/31/2021    | <a href="https://www.ncbi.nlm.nih.gov/nuccore/MW217097.1">https://www.ncbi.nlm.nih.gov/nuccore/MW217097.1</a> | MW855584         | 07/26/2021    | <a href="https://www.ncbi.nlm.nih.gov/nuccore/MW855584.1">https://www.ncbi.nlm.nih.gov/nuccore/MW855584.1</a> |
| <b>DSD331</b>            | Southeastern Iloilo   | MW217113         | 03/31/2021    | <a href="https://www.ncbi.nlm.nih.gov/nuccore/MW217113.1">https://www.ncbi.nlm.nih.gov/nuccore/MW217113.1</a> | MW831619         | 07/26/2021    | <a href="https://www.ncbi.nlm.nih.gov/nuccore/MW831619.1">https://www.ncbi.nlm.nih.gov/nuccore/MW831619.1</a> |
| <b>DSD299</b>            | Southeastern Iloilo   | MW217181         | 03/31/2021    | <a href="https://www.ncbi.nlm.nih.gov/nuccore/MW217181.1">https://www.ncbi.nlm.nih.gov/nuccore/MW217181.1</a> | MW776874         | 07/26/2021    | <a href="https://www.ncbi.nlm.nih.gov/nuccore/MW776874.1">https://www.ncbi.nlm.nih.gov/nuccore/MW776874.1</a> |
| <b>DSD1631</b>           | Negros Occidental     | MW217167         | 03/31/2021    | <a href="https://www.ncbi.nlm.nih.gov/nuccore/MW217167.1">https://www.ncbi.nlm.nih.gov/nuccore/MW217167.1</a> | MW776875         | 07/26/2021    | <a href="https://www.ncbi.nlm.nih.gov/nuccore/MW776875.1">https://www.ncbi.nlm.nih.gov/nuccore/MW776875.1</a> |
| <b>DSD1886</b>           | Tubbataha Reefs       | MW217079         | 03/31/2021    | <a href="https://www.ncbi.nlm.nih.gov/nuccore/1928656540">https://www.ncbi.nlm.nih.gov/nuccore/1928656540</a> | MW776876         | 07/26/2021    | <a href="https://www.ncbi.nlm.nih.gov/nuccore/MW776876.1">https://www.ncbi.nlm.nih.gov/nuccore/MW776876.1</a> |
| <b>DSD1912</b>           | South central Visayas | MW217108         | 03/31/2021    | <a href="https://www.ncbi.nlm.nih.gov/nuccore/MW217108.1">https://www.ncbi.nlm.nih.gov/nuccore/MW217108.1</a> | MW855585         | 07/26/2021    | <a href="https://www.ncbi.nlm.nih.gov/nuccore/MW855585.1">https://www.ncbi.nlm.nih.gov/nuccore/MW855585.1</a> |
| <b>DSD3040</b>           | Negros Occidental     | MW217151         | 03/31/2021    | <a href="https://www.ncbi.nlm.nih.gov/nuccore/MW217151.1">https://www.ncbi.nlm.nih.gov/nuccore/MW217151.1</a> | MW883337         | 07/26/2021    | <a href="https://www.ncbi.nlm.nih.gov/nuccore/MW883337.1">https://www.ncbi.nlm.nih.gov/nuccore/MW883337.1</a> |
| <b>DSD133</b>            | Southeastern Iloilo   | MW217123         | 03/31/2021    | <a href="https://www.ncbi.nlm.nih.gov/nuccore/MW217123.1">https://www.ncbi.nlm.nih.gov/nuccore/MW217123.1</a> | MW820618         | 07/28/2021    | <a href="https://www.ncbi.nlm.nih.gov/nuccore/MW820618.1">https://www.ncbi.nlm.nih.gov/nuccore/MW820618.1</a> |

| <i>Streptomyces</i><br>Strain Code | Collection Site     | 16s rRNA         |               |                                                                                                               | rpoB             |               |                                                                                                               |
|------------------------------------|---------------------|------------------|---------------|---------------------------------------------------------------------------------------------------------------|------------------|---------------|---------------------------------------------------------------------------------------------------------------|
|                                    |                     | Accession number | Date Released | Accession URL                                                                                                 | Accession Number | Date Released | Accession URL                                                                                                 |
| <b>DSD164</b>                      | Southern Antique    | MW217124         | 03/31/2021    | <a href="https://www.ncbi.nlm.nih.gov/nuccore/MW217124.1">https://www.ncbi.nlm.nih.gov/nuccore/MW217124.1</a> | MW820619         | 07/28/2021    | <a href="https://www.ncbi.nlm.nih.gov/nuccore/MW820619.1">https://www.ncbi.nlm.nih.gov/nuccore/MW820619.1</a> |
| <b>DSD165</b>                      | Southern Antique    | MW217125         | 03/31/2021    | <a href="https://www.ncbi.nlm.nih.gov/nuccore/MW217125.1">https://www.ncbi.nlm.nih.gov/nuccore/MW217125.1</a> | MW725554         | 07/26/2021    | <a href="https://www.ncbi.nlm.nih.gov/nuccore/MW725554.1">https://www.ncbi.nlm.nih.gov/nuccore/MW725554.1</a> |
| <b>DSD294</b>                      | Southeastern Iloilo | MW217127         | 03/31/2021    | <a href="https://www.ncbi.nlm.nih.gov/nuccore/MW217127.1">https://www.ncbi.nlm.nih.gov/nuccore/MW217127.1</a> | MW979248         | 07/26/2021    | <a href="https://www.ncbi.nlm.nih.gov/nuccore/MW979248.1">https://www.ncbi.nlm.nih.gov/nuccore/MW979248.1</a> |
| <b>DSD318</b>                      | Southeastern Iloilo | MW217112         | 03/31/2021    | <a href="https://www.ncbi.nlm.nih.gov/nuccore/MW217112.1">https://www.ncbi.nlm.nih.gov/nuccore/MW217112.1</a> | MW922317         | 07/26/2021    | <a href="https://www.ncbi.nlm.nih.gov/nuccore/MW922317.1">https://www.ncbi.nlm.nih.gov/nuccore/MW922317.1</a> |
| <b>DSD322</b>                      | Southern Antique    | MW217140         | 03/31/2021    | <a href="https://www.ncbi.nlm.nih.gov/nuccore/MW217140.1">https://www.ncbi.nlm.nih.gov/nuccore/MW217140.1</a> | MW725555         | 07/26/2021    | <a href="https://www.ncbi.nlm.nih.gov/nuccore/MW725555.1">https://www.ncbi.nlm.nih.gov/nuccore/MW725555.1</a> |
| <b>DSD357</b>                      | Southern Antique    | MW217128         | 03/31/2021    | <a href="https://www.ncbi.nlm.nih.gov/nuccore/MW217128.1">https://www.ncbi.nlm.nih.gov/nuccore/MW217128.1</a> | MW725556         | 07/26/2021    | <a href="https://www.ncbi.nlm.nih.gov/nuccore/MW725556.1">https://www.ncbi.nlm.nih.gov/nuccore/MW725556.1</a> |
| <b>DSD360</b>                      | Southern Antique    | MW217134         | 03/31/2021    | <a href="https://www.ncbi.nlm.nih.gov/nuccore/MW217134.1">https://www.ncbi.nlm.nih.gov/nuccore/MW217134.1</a> | MW820621         | 07/28/2021    | <a href="https://www.ncbi.nlm.nih.gov/nuccore/MW820621.1">https://www.ncbi.nlm.nih.gov/nuccore/MW820621.1</a> |
| <b>DSD775</b>                      | Western Antique     | MW217138         | 03/31/2021    | <a href="https://www.ncbi.nlm.nih.gov/nuccore/1928656595">https://www.ncbi.nlm.nih.gov/nuccore/1928656595</a> | MW831606         | 07/26/2021    | <a href="https://www.ncbi.nlm.nih.gov/nuccore/MW831606.1">https://www.ncbi.nlm.nih.gov/nuccore/MW831606.1</a> |
| <b>DSD800</b>                      | Western Antique     | MW217114         | 03/31/2021    | <a href="https://www.ncbi.nlm.nih.gov/nuccore/MW217114.1">https://www.ncbi.nlm.nih.gov/nuccore/MW217114.1</a> | MW776842         | 07/26/2021    | <a href="https://www.ncbi.nlm.nih.gov/nuccore/MW776842.1">https://www.ncbi.nlm.nih.gov/nuccore/MW776842.1</a> |
| <b>DSD998</b>                      | Western Antique     | MW217115         | 03/31/2021    | <a href="https://www.ncbi.nlm.nih.gov/nuccore/MW217115.1">https://www.ncbi.nlm.nih.gov/nuccore/MW217115.1</a> | MW776843         | 07/26/2021    | <a href="https://www.ncbi.nlm.nih.gov/nuccore/MW776843.1">https://www.ncbi.nlm.nih.gov/nuccore/MW776843.1</a> |

| <b><i>Streptomyces</i><br/>Strain Code</b> | <b>Collection Site</b> | <b>16s rRNA</b>         |                      |                                                                                                               | <b>rpoB</b>             |                      |                                                                                                               |
|--------------------------------------------|------------------------|-------------------------|----------------------|---------------------------------------------------------------------------------------------------------------|-------------------------|----------------------|---------------------------------------------------------------------------------------------------------------|
|                                            |                        | <b>Accession number</b> | <b>Date Released</b> | <b>Accession URL</b>                                                                                          | <b>Accession Number</b> | <b>Date Released</b> | <b>Accession URL</b>                                                                                          |
| <b>DSD1986</b>                             | North western Antique  | MW217101                | 03/31/2021           | <a href="https://www.ncbi.nlm.nih.gov/nuccore/MW217101.1">https://www.ncbi.nlm.nih.gov/nuccore/MW217101.1</a> | MW725557                | 07/26/2021           | <a href="https://www.ncbi.nlm.nih.gov/nuccore/MW725557.1">https://www.ncbi.nlm.nih.gov/nuccore/MW725557.1</a> |
| <b>DSD176</b>                              | Southern Antique       | MW217126                | 03/31/2021           | <a href="https://www.ncbi.nlm.nih.gov/nuccore/MW217126.1">https://www.ncbi.nlm.nih.gov/nuccore/MW217126.1</a> | MW693208                | 07/26/2021           | <a href="https://www.ncbi.nlm.nih.gov/nuccore/MW693208.1">https://www.ncbi.nlm.nih.gov/nuccore/MW693208.1</a> |
| <b>DSD342</b>                              | Southern Antique       | MW217081                | 03/31/2021           | <a href="https://www.ncbi.nlm.nih.gov/nuccore/MW217081.1">https://www.ncbi.nlm.nih.gov/nuccore/MW217081.1</a> | MW855586                | 07/26/2021           | <a href="https://www.ncbi.nlm.nih.gov/nuccore/MW855586.1">https://www.ncbi.nlm.nih.gov/nuccore/MW855586.1</a> |
| <b>DSD476</b>                              | Southeastern Iloilo    | MW217161                | 03/31/2021           | <a href="https://www.ncbi.nlm.nih.gov/nuccore/MW217161.1">https://www.ncbi.nlm.nih.gov/nuccore/MW217161.1</a> | MW855587                | 07/26/2021           | <a href="https://www.ncbi.nlm.nih.gov/nuccore/MW855587.1">https://www.ncbi.nlm.nih.gov/nuccore/MW855587.1</a> |
| <b>DSD767</b>                              | North western Antique  | MW217085                | 03/31/2021           | <a href="https://www.ncbi.nlm.nih.gov/nuccore/MW217085.1">https://www.ncbi.nlm.nih.gov/nuccore/MW217085.1</a> | MW820645                | 07/26/2021           | <a href="https://www.ncbi.nlm.nih.gov/nuccore/MW820645.1">https://www.ncbi.nlm.nih.gov/nuccore/MW820645.1</a> |
| <b>DSD757</b>                              | Southern Antique       | MW217068                | 03/31/2021           | <a href="https://www.ncbi.nlm.nih.gov/nuccore/MW217068.1">https://www.ncbi.nlm.nih.gov/nuccore/MW217068.1</a> | MW855588                | 07/26/2021           | <a href="https://www.ncbi.nlm.nih.gov/nuccore/MW855588.1">https://www.ncbi.nlm.nih.gov/nuccore/MW855588.1</a> |
| <b>DSD954</b>                              | Northern Antique       | MW217089                | 03/31/2021           | <a href="https://www.ncbi.nlm.nih.gov/nuccore/MW217089.1">https://www.ncbi.nlm.nih.gov/nuccore/MW217089.1</a> | MW883338                | 07/26/2021           | <a href="https://www.ncbi.nlm.nih.gov/nuccore/MW883338.1">https://www.ncbi.nlm.nih.gov/nuccore/MW883338.1</a> |
| <b>DSD250</b>                              | Southern Antique       | MW217165                | 03/31/2021           | <a href="https://www.ncbi.nlm.nih.gov/nuccore/MW217098.1">https://www.ncbi.nlm.nih.gov/nuccore/MW217098.1</a> | MW831618                | 07/26/2021           | <a href="https://www.ncbi.nlm.nih.gov/nuccore/MW831618.1">https://www.ncbi.nlm.nih.gov/nuccore/MW831618.1</a> |
| <b>DSD251</b>                              | Southern Antique       | MW217098                | 03/31/2021           | <a href="https://www.ncbi.nlm.nih.gov/nuccore/MW217165.1">https://www.ncbi.nlm.nih.gov/nuccore/MW217165.1</a> | MW776871                | 07/26/2021           | <a href="https://www.ncbi.nlm.nih.gov/nuccore/MW776871.1">https://www.ncbi.nlm.nih.gov/nuccore/MW776871.1</a> |
| <b>DSD1764</b>                             | Northern Antique       | MW217139                | 03/31/2021           | <a href="https://www.ncbi.nlm.nih.gov/nuccore/MW217139.1">https://www.ncbi.nlm.nih.gov/nuccore/MW217139.1</a> | MW776872                | 07/26/2021           | <a href="https://www.ncbi.nlm.nih.gov/nuccore/MW776872.1">https://www.ncbi.nlm.nih.gov/nuccore/MW776872.1</a> |



| <b><i>Streptomyces</i><br/>Strain Code</b> | <b>Collection Site</b> | <b>16s rRNA</b>         |                      |                                                                                                               | <b>rpoB</b>             |                      |                                                                                                               |
|--------------------------------------------|------------------------|-------------------------|----------------------|---------------------------------------------------------------------------------------------------------------|-------------------------|----------------------|---------------------------------------------------------------------------------------------------------------|
|                                            |                        | <b>Accession number</b> | <b>Date Released</b> | <b>Accession URL</b>                                                                                          | <b>Accession Number</b> | <b>Date Released</b> | <b>Accession URL</b>                                                                                          |
| <b>DSD1804</b>                             | Northern Antique       | MW217083                | 03/31/2021           | <a href="https://www.ncbi.nlm.nih.gov/nuccore/MW217083.1">https://www.ncbi.nlm.nih.gov/nuccore/MW217083.1</a> | MW776873                | 07/26/2021           | <a href="https://www.ncbi.nlm.nih.gov/nuccore/MW776873.1">https://www.ncbi.nlm.nih.gov/nuccore/MW776873.1</a> |
| <b>DSD2594</b>                             | Tubbataha Reefs        | MW217102                | 03/31/2021           | <a href="https://www.ncbi.nlm.nih.gov/nuccore/MW217102.1">https://www.ncbi.nlm.nih.gov/nuccore/MW217102.1</a> | MW831617                | 07/26/2021           | <a href="https://www.ncbi.nlm.nih.gov/nuccore/MW831617.1">https://www.ncbi.nlm.nih.gov/nuccore/MW831617.1</a> |
| <b>DSD2610</b>                             | Tubbataha Reefs        | MW217073                | 03/31/2021           | <a href="https://www.ncbi.nlm.nih.gov/nuccore/MW217073.1">https://www.ncbi.nlm.nih.gov/nuccore/MW217073.1</a> | MW820646                | 07/26/2021           | <a href="https://www.ncbi.nlm.nih.gov/nuccore/MW820646.1">https://www.ncbi.nlm.nih.gov/nuccore/MW820646.1</a> |
| <b>DSD2613</b>                             | Tubbataha Reefs        | MW217194                | 03/31/2021           | <a href="https://www.ncbi.nlm.nih.gov/nuccore/MW217194.1">https://www.ncbi.nlm.nih.gov/nuccore/MW217194.1</a> | MW820644                | 07/26/2021           | <a href="https://www.ncbi.nlm.nih.gov/nuccore/MW820644.1">https://www.ncbi.nlm.nih.gov/nuccore/MW820644.1</a> |
| <b>DSD3030</b>                             | Tubbataha Reefs        | MW217120                | 03/31/2021           | <a href="https://www.ncbi.nlm.nih.gov/nuccore/MW217120.1">https://www.ncbi.nlm.nih.gov/nuccore/MW217120.1</a> | MW776870                | 07/26/2021           | <a href="https://www.ncbi.nlm.nih.gov/nuccore/MW776870.1">https://www.ncbi.nlm.nih.gov/nuccore/MW776870.1</a> |
| <b>DSD3034</b>                             | Tubbataha Reefs        | MW217121                | 03/31/2021           | <a href="https://www.ncbi.nlm.nih.gov/nuccore/MW217121.1">https://www.ncbi.nlm.nih.gov/nuccore/MW217121.1</a> | MW820642                | 07/26/2021           | <a href="https://www.ncbi.nlm.nih.gov/nuccore/MW820642.1">https://www.ncbi.nlm.nih.gov/nuccore/MW820642.1</a> |
| <b>DSD3047</b>                             | Tubbataha Reefs        | MW217195                | 03/31/2021           | <a href="https://www.ncbi.nlm.nih.gov/nuccore/MW217195.1">https://www.ncbi.nlm.nih.gov/nuccore/MW217195.1</a> | MW820620                | 07/28/2021           | <a href="https://www.ncbi.nlm.nih.gov/nuccore/MW820620.1">https://www.ncbi.nlm.nih.gov/nuccore/MW820620.1</a> |
| <b>DSD264</b>                              | Southern Antique       | MW217164                | 03/31/2021           | <a href="https://www.ncbi.nlm.nih.gov/nuccore/MW217164.1">https://www.ncbi.nlm.nih.gov/nuccore/MW217164.1</a> | MW855589                | 07/26/2021           | <a href="https://www.ncbi.nlm.nih.gov/nuccore/MW855589.1">https://www.ncbi.nlm.nih.gov/nuccore/MW855589.1</a> |
| <b>DSD618</b>                              | Southeastern Iloilo    | MW217084                | 03/31/2021           | <a href="https://www.ncbi.nlm.nih.gov/nuccore/MW217084.1">https://www.ncbi.nlm.nih.gov/nuccore/MW217084.1</a> | MW725549                | 07/26/2021           | <a href="https://www.ncbi.nlm.nih.gov/nuccore/MW725549.1">https://www.ncbi.nlm.nih.gov/nuccore/MW725549.1</a> |
| <b>DSD3049</b>                             | Occidental Mindoro     | MW217071                | 03/31/2021           | <a href="https://www.ncbi.nlm.nih.gov/nuccore/MW217071.1">https://www.ncbi.nlm.nih.gov/nuccore/MW217071.1</a> | MW820641                | 07/26/2021           | <a href="https://www.ncbi.nlm.nih.gov/nuccore/MW820641.1">https://www.ncbi.nlm.nih.gov/nuccore/MW820641.1</a> |

| <i>Streptomyces</i><br>Strain Code | Collection Site       | 16s rRNA         |               |                                                                                                               | rpoB             |               |                                                                                                               |
|------------------------------------|-----------------------|------------------|---------------|---------------------------------------------------------------------------------------------------------------|------------------|---------------|---------------------------------------------------------------------------------------------------------------|
|                                    |                       | Accession number | Date Released | Accession URL                                                                                                 | Accession Number | Date Released | Accession URL                                                                                                 |
| <b>DSD154</b>                      | Negros Oriental       | MW217166         | 03/31/2021    | <a href="https://www.ncbi.nlm.nih.gov/nuccore/MW217166.1">https://www.ncbi.nlm.nih.gov/nuccore/MW217166.1</a> | MW831608         | 07/26/2021    | <a href="https://www.ncbi.nlm.nih.gov/nuccore/MW831608.1">https://www.ncbi.nlm.nih.gov/nuccore/MW831608.1</a> |
| <b>DSD261</b>                      | Negros Occidental     | MW217147         | 03/31/2021    | <a href="https://www.ncbi.nlm.nih.gov/nuccore/MW217147.1">https://www.ncbi.nlm.nih.gov/nuccore/MW217147.1</a> | MW767611         | 07/26/2021    | <a href="https://www.ncbi.nlm.nih.gov/nuccore/MW767611.1">https://www.ncbi.nlm.nih.gov/nuccore/MW767611.1</a> |
| <b>DSD292</b>                      | Southern Antique      | MW217162         | 03/31/2021    | <a href="https://www.ncbi.nlm.nih.gov/nuccore/MW217162.1">https://www.ncbi.nlm.nih.gov/nuccore/MW217162.1</a> | MW753172         | 07/28/2021    | <a href="https://www.ncbi.nlm.nih.gov/nuccore/MW753172.1">https://www.ncbi.nlm.nih.gov/nuccore/MW753172.1</a> |
| <b>DSD309</b>                      | Negros Oriental       | MW217086         | 03/31/2021    | <a href="https://www.ncbi.nlm.nih.gov/nuccore/MW217086.1">https://www.ncbi.nlm.nih.gov/nuccore/MW217086.1</a> | MW767616         | 07/26/2021    | <a href="https://www.ncbi.nlm.nih.gov/nuccore/MW767616.1">https://www.ncbi.nlm.nih.gov/nuccore/MW767616.1</a> |
| <b>DSD481</b>                      | South central Visayas | MW217129         | 03/31/2021    | <a href="https://www.ncbi.nlm.nih.gov/nuccore/MW217129.1">https://www.ncbi.nlm.nih.gov/nuccore/MW217129.1</a> | MW820612         | 07/28/2021    | <a href="https://www.ncbi.nlm.nih.gov/nuccore/MW820612.1">https://www.ncbi.nlm.nih.gov/nuccore/MW820612.1</a> |
| <b>DSD840</b>                      | Southern Antique      | MW217160         | 03/31/2021    | <a href="https://www.ncbi.nlm.nih.gov/nuccore/MW217160.1">https://www.ncbi.nlm.nih.gov/nuccore/MW217160.1</a> | MW767615         | 07/26/2021    | <a href="https://www.ncbi.nlm.nih.gov/nuccore/MW767615.1">https://www.ncbi.nlm.nih.gov/nuccore/MW767615.1</a> |
| <b>DSD982</b>                      | Southeastern Iloilo   | MW217122         | 03/31/2021    | <a href="https://www.ncbi.nlm.nih.gov/nuccore/MW217122.1">https://www.ncbi.nlm.nih.gov/nuccore/MW217122.1</a> | MW725558         | 07/26/2021    | <a href="https://www.ncbi.nlm.nih.gov/nuccore/MW725558.1">https://www.ncbi.nlm.nih.gov/nuccore/MW725558.1</a> |
| <b>DSD984</b>                      | Negros Oriental       | MW217111         | 03/31/2021    | <a href="https://www.ncbi.nlm.nih.gov/nuccore/MW217111.1">https://www.ncbi.nlm.nih.gov/nuccore/MW217111.1</a> | MW767614         | 07/26/2021    | <a href="https://www.ncbi.nlm.nih.gov/nuccore/MW767614.1">https://www.ncbi.nlm.nih.gov/nuccore/MW767614.1</a> |
| <b>DSD985</b>                      | Western Antique       | MW217130         | 03/31/2021    | <a href="https://www.ncbi.nlm.nih.gov/nuccore/MW217130.1">https://www.ncbi.nlm.nih.gov/nuccore/MW217130.1</a> | MW753175         | 07/28/2021    | <a href="https://www.ncbi.nlm.nih.gov/nuccore/MW753175.1">https://www.ncbi.nlm.nih.gov/nuccore/MW753175.1</a> |
| <b>DSD986</b>                      | Negros Occidental     | MW217182         | 03/31/2021    | <a href="https://www.ncbi.nlm.nih.gov/nuccore/MW217182.1">https://www.ncbi.nlm.nih.gov/nuccore/MW217182.1</a> | MW767613         | 07/26/2021    | <a href="https://www.ncbi.nlm.nih.gov/nuccore/MW767613.1">https://www.ncbi.nlm.nih.gov/nuccore/MW767613.1</a> |

| <b><i>Streptomyces</i><br/>Strain Code</b> | <b>Collection Site</b> | <b>16s rRNA</b>         |                      |                                                                                                               | <b>rpoB</b>             |                      |                                                                                                                   |
|--------------------------------------------|------------------------|-------------------------|----------------------|---------------------------------------------------------------------------------------------------------------|-------------------------|----------------------|-------------------------------------------------------------------------------------------------------------------|
|                                            |                        | <b>Accession number</b> | <b>Date Released</b> | <b>Accession URL</b>                                                                                          | <b>Accession Number</b> | <b>Date Released</b> | <b>Accession URL</b>                                                                                              |
| <b>DSD988</b>                              | Negros Oriental        | MW217159                | 03/31/2021           | <a href="https://www.ncbi.nlm.nih.gov/nuccore/MW217159.1">https://www.ncbi.nlm.nih.gov/nuccore/MW217159.1</a> | MW855580                | 07/26/2021           | <a href="https://www.ncbi.nlm.nih.gov/nuccore/MW855580.1">https://www.ncbi.nlm.nih.gov/nuccore/MW855580.1</a>     |
| <b>DSD991</b>                              | Southern Antique       | MW217145                | 03/31/2021           | <a href="https://www.ncbi.nlm.nih.gov/nuccore/MW217145.1">https://www.ncbi.nlm.nih.gov/nuccore/MW217145.1</a> | MW753170                | 07/28/2021           | <a href="https://www.ncbi.nlm.nih.gov/nuccore/MW753170.1">https://www.ncbi.nlm.nih.gov/nuccore/MW753170.1</a>     |
| <b>DSD992</b>                              | Western Antique        | MW217141                | 03/31/2021           | <a href="https://www.ncbi.nlm.nih.gov/nuccore/MW217141.1">https://www.ncbi.nlm.nih.gov/nuccore/MW217141.1</a> | MW753176                | 07/28/2021           | <a href="https://www.ncbi.nlm.nih.gov/nuccore/MW753176.1">https://www.ncbi.nlm.nih.gov/nuccore/MW753176.1</a>     |
| <b>DSD993</b>                              | Negros Oriental        | MW217183                | 03/31/2021           | <a href="https://www.ncbi.nlm.nih.gov/nuccore/MW217183.1">https://www.ncbi.nlm.nih.gov/nuccore/MW217183.1</a> | MW831614                | 07/26/2021           | <a href="https://www.ncbi.nlm.nih.gov/nuccore/MW831614.1">https://www.ncbi.nlm.nih.gov/nuccore/MW831614.1</a>     |
| <b>DSD995</b>                              | Negros Oriental        | MW217148                | 03/31/2021           | <a href="https://www.ncbi.nlm.nih.gov/nuccore/MW217148.1">https://www.ncbi.nlm.nih.gov/nuccore/MW217148.1</a> | MW831612                | 07/26/2021           | <a href="https://www.ncbi.nlm.nih.gov/nuccore/?term=dsd995">https://www.ncbi.nlm.nih.gov/nuccore/?term=dsd995</a> |
| <b>DSD1072</b>                             | Southern Antique       | MW217075                | 03/31/2021           | <a href="https://www.ncbi.nlm.nih.gov/nuccore/MW217075.1">https://www.ncbi.nlm.nih.gov/nuccore/MW217075.1</a> | MW767612                | 07/26/2021           | <a href="https://www.ncbi.nlm.nih.gov/nuccore/MW767612.1">https://www.ncbi.nlm.nih.gov/nuccore/MW767612.1</a>     |
| <b>DSD1083</b>                             | Negros Occidental      | MW217090                | 03/31/2021           | <a href="https://www.ncbi.nlm.nih.gov/nuccore/MW217090.1">https://www.ncbi.nlm.nih.gov/nuccore/MW217090.1</a> | MW820639                | 07/26/2021           | <a href="https://www.ncbi.nlm.nih.gov/nuccore/MW820639.1">https://www.ncbi.nlm.nih.gov/nuccore/MW820639.1</a>     |
| <b>DSD1409</b>                             | Negros Occidental      | MW217158                | 03/31/2021           | <a href="https://www.ncbi.nlm.nih.gov/nuccore/MW217158.1">https://www.ncbi.nlm.nih.gov/nuccore/MW217158.1</a> | MW831607                | 07/26/2021           | <a href="https://www.ncbi.nlm.nih.gov/nuccore/MW831607.1">https://www.ncbi.nlm.nih.gov/nuccore/MW831607.1</a>     |
| <b>DSD1628</b>                             | Negros Occidental      | MW217189                | 03/31/2021           | <a href="https://www.ncbi.nlm.nih.gov/nuccore/MW217189.1">https://www.ncbi.nlm.nih.gov/nuccore/MW217189.1</a> | MW855581                | 07/26/2021           | <a href="https://www.ncbi.nlm.nih.gov/nuccore/MW855581.1">https://www.ncbi.nlm.nih.gov/nuccore/MW855581.1</a>     |
| <b>DSD1629</b>                             | Negros Oriental        | MW217107                | 03/31/2021           | <a href="https://www.ncbi.nlm.nih.gov/nuccore/MW217107.1">https://www.ncbi.nlm.nih.gov/nuccore/MW217107.1</a> | MW753178                | 07/28/2021           | <a href="https://www.ncbi.nlm.nih.gov/nuccore/MW753178.1">https://www.ncbi.nlm.nih.gov/nuccore/MW753178.1</a>     |

| <b><i>Streptomyces</i><br/>Strain Code</b> | <b>Collection Site</b> | <b>16s rRNA</b>         |                      |                                                                                                               | <b>rpoB</b>             |                      |                                                                                                               |
|--------------------------------------------|------------------------|-------------------------|----------------------|---------------------------------------------------------------------------------------------------------------|-------------------------|----------------------|---------------------------------------------------------------------------------------------------------------|
|                                            |                        | <b>Accession number</b> | <b>Date Released</b> | <b>Accession URL</b>                                                                                          | <b>Accession Number</b> | <b>Date Released</b> | <b>Accession URL</b>                                                                                          |
| <b>DSD1632</b>                             | Negros Occidental      | MW217190                | 03/31/2021           | <a href="https://www.ncbi.nlm.nih.gov/nuccore/MW217190.1">https://www.ncbi.nlm.nih.gov/nuccore/MW217190.1</a> | MW855582                | 07/26/2021           | <a href="https://www.ncbi.nlm.nih.gov/nuccore/MW855582.1">https://www.ncbi.nlm.nih.gov/nuccore/MW855582.1</a> |
| <b>DSD1636</b>                             | Occidental Mindoro     | MW217092                | 03/31/2021           | <a href="https://www.ncbi.nlm.nih.gov/nuccore/MW217092.1">https://www.ncbi.nlm.nih.gov/nuccore/MW217092.1</a> | MW831609                | 07/26/2021           | <a href="https://www.ncbi.nlm.nih.gov/nuccore/MW831609.1">https://www.ncbi.nlm.nih.gov/nuccore/MW831609.1</a> |
| <b>DSD1637</b>                             | Negros Occidental      | MW217105                | 03/31/2021           | <a href="https://www.ncbi.nlm.nih.gov/nuccore/MW217105.1">https://www.ncbi.nlm.nih.gov/nuccore/MW217105.1</a> | MW753177                | 07/28/2021           | <a href="https://www.ncbi.nlm.nih.gov/nuccore/MW753177.1">https://www.ncbi.nlm.nih.gov/nuccore/MW753177.1</a> |
| <b>DSD1639</b>                             | Negros Occidental      | MW217177                | 03/31/2021           | <a href="https://www.ncbi.nlm.nih.gov/nuccore/MW217177.1">https://www.ncbi.nlm.nih.gov/nuccore/MW217177.1</a> | MW776844                | 07/26/2021           | <a href="https://www.ncbi.nlm.nih.gov/nuccore/MW776844.1">https://www.ncbi.nlm.nih.gov/nuccore/MW776844.1</a> |
| <b>DSD1641</b>                             | Negros Oriental        | MW217104                | 03/31/2021           | <a href="https://www.ncbi.nlm.nih.gov/nuccore/MW217104.1">https://www.ncbi.nlm.nih.gov/nuccore/MW217104.1</a> | MW831610                | 07/26/2021           | <a href="https://www.ncbi.nlm.nih.gov/nuccore/MW831610.1">https://www.ncbi.nlm.nih.gov/nuccore/MW831610.1</a> |
| <b>DSD1642</b>                             | Negros Oriental        | MW217106                | 03/31/2021           | <a href="https://www.ncbi.nlm.nih.gov/nuccore/MW217106.1">https://www.ncbi.nlm.nih.gov/nuccore/MW217106.1</a> | MW820640                | 07/26/2021           | <a href="https://www.ncbi.nlm.nih.gov/nuccore/MW820640.1">https://www.ncbi.nlm.nih.gov/nuccore/MW820640.1</a> |
| <b>DSD1643</b>                             | Negros Oriental        | MW217176                | 03/31/2021           | <a href="https://www.ncbi.nlm.nih.gov/nuccore/MW217176.1">https://www.ncbi.nlm.nih.gov/nuccore/MW217176.1</a> | MW831611                | 07/26/2021           | <a href="https://www.ncbi.nlm.nih.gov/nuccore/MW831611.1">https://www.ncbi.nlm.nih.gov/nuccore/MW831611.1</a> |
| <b>DSD1690</b>                             | Western Antique        | MW217146                | 03/31/2021           | <a href="https://www.ncbi.nlm.nih.gov/nuccore/MW217146.1">https://www.ncbi.nlm.nih.gov/nuccore/MW217146.1</a> | MW753174                | 07/28/2021           | <a href="https://www.ncbi.nlm.nih.gov/nuccore/MW753174.1">https://www.ncbi.nlm.nih.gov/nuccore/MW753174.1</a> |
| <b>DSD1692</b>                             | South central Visayas  | MW217191                | 03/31/2021           | <a href="https://www.ncbi.nlm.nih.gov/nuccore/MW217191.1">https://www.ncbi.nlm.nih.gov/nuccore/MW217191.1</a> | MW831616                | 07/26/2021           | <a href="https://www.ncbi.nlm.nih.gov/nuccore/MW831616.1">https://www.ncbi.nlm.nih.gov/nuccore/MW831616.1</a> |
| <b>DSD1719</b>                             | Negros Occidental      | MW217109                | 03/31/2021           | <a href="https://www.ncbi.nlm.nih.gov/nuccore/MW217109.1">https://www.ncbi.nlm.nih.gov/nuccore/MW217109.1</a> | MW753171                | 07/28/2021           | <a href="https://www.ncbi.nlm.nih.gov/nuccore/MW753171.1">https://www.ncbi.nlm.nih.gov/nuccore/MW753171.1</a> |

| <i>Streptomyces</i><br>Strain Code | Collection Site     | 16s rRNA         |               |                                                                                                               | rpoB             |               |                                                                                                               |
|------------------------------------|---------------------|------------------|---------------|---------------------------------------------------------------------------------------------------------------|------------------|---------------|---------------------------------------------------------------------------------------------------------------|
|                                    |                     | Accession number | Date Released | Accession URL                                                                                                 | Accession Number | Date Released | Accession URL                                                                                                 |
| <b>DSD1969</b>                     | Negros Occidental   | MW217133         | 03/31/2021    | <a href="https://www.ncbi.nlm.nih.gov/nuccore/MW217133.1">https://www.ncbi.nlm.nih.gov/nuccore/MW217133.1</a> | MW831615         | 07/26/2021    | <a href="https://www.ncbi.nlm.nih.gov/nuccore/MW831615.1">https://www.ncbi.nlm.nih.gov/nuccore/MW831615.1</a> |
| <b>DSD2596</b>                     | Negros Occidental   | MW217198         | 03/31/2021    | <a href="https://www.ncbi.nlm.nih.gov/nuccore/MW217198.1">https://www.ncbi.nlm.nih.gov/nuccore/MW217198.1</a> | MW776869         | 07/26/2021    | <a href="https://www.ncbi.nlm.nih.gov/nuccore/MW776869.1">https://www.ncbi.nlm.nih.gov/nuccore/MW776869.1</a> |
| <b>DSD3100</b>                     | Occidental Mindoro  | MW217072         | 03/31/2021    | <a href="https://www.ncbi.nlm.nih.gov/nuccore/MW217072.1">https://www.ncbi.nlm.nih.gov/nuccore/MW217072.1</a> | MW831613         | 07/26/2021    | <a href="https://www.ncbi.nlm.nih.gov/nuccore/MW831613.1">https://www.ncbi.nlm.nih.gov/nuccore/MW831613.1</a> |
| <b>DSD2603</b>                     | Tubbataha Reefs     | MW217103         | 03/31/2021    | <a href="https://www.ncbi.nlm.nih.gov/nuccore/MW217103.1">https://www.ncbi.nlm.nih.gov/nuccore/MW217103.1</a> | MW855590         | 07/26/2021    | <a href="https://www.ncbi.nlm.nih.gov/nuccore/MW855590.1">https://www.ncbi.nlm.nih.gov/nuccore/MW855590.1</a> |
| <b>DSD120</b>                      | Southeastern Iloilo | MW217172         | 03/31/2021    | <a href="https://www.ncbi.nlm.nih.gov/nuccore/MW217172.1">https://www.ncbi.nlm.nih.gov/nuccore/MW217172.1</a> | MW725550         | 07/26/2021    | <a href="https://www.ncbi.nlm.nih.gov/nuccore/MW725550.1">https://www.ncbi.nlm.nih.gov/nuccore/MW725550.1</a> |
| <b>DSD243</b>                      | Southern Antique    | MW217136         | 03/31/2021    | <a href="https://www.ncbi.nlm.nih.gov/nuccore/MW217136.1">https://www.ncbi.nlm.nih.gov/nuccore/MW217136.1</a> | MW820613         | 07/28/2021    | <a href="https://www.ncbi.nlm.nih.gov/nuccore/MW820613.1">https://www.ncbi.nlm.nih.gov/nuccore/MW820613.1</a> |
| <b>DSD284</b>                      | Southern Antique    | MW217163         | 03/31/2021    | <a href="https://www.ncbi.nlm.nih.gov/nuccore/MW217163.1">https://www.ncbi.nlm.nih.gov/nuccore/MW217163.1</a> | MW725551         | 07/26/2021    | <a href="https://www.ncbi.nlm.nih.gov/nuccore/MW725551.1">https://www.ncbi.nlm.nih.gov/nuccore/MW725551.1</a> |
| <b>DSD323</b>                      | Southern Antique    | MW217078         | 03/31/2021    | <a href="https://www.ncbi.nlm.nih.gov/nuccore/MW217078.1">https://www.ncbi.nlm.nih.gov/nuccore/MW217078.1</a> | MW693209         | 07/26/2021    | <a href="https://www.ncbi.nlm.nih.gov/nuccore/MW693209.1">https://www.ncbi.nlm.nih.gov/nuccore/MW693209.1</a> |
| <b>DSD501</b>                      | Northern Antique    | MW217088         | 03/31/2021    | <a href="https://www.ncbi.nlm.nih.gov/nuccore/MW217088.1">https://www.ncbi.nlm.nih.gov/nuccore/MW217088.1</a> | MW820614         | 07/28/2021    | <a href="https://www.ncbi.nlm.nih.gov/nuccore/MW820614.1">https://www.ncbi.nlm.nih.gov/nuccore/MW820614.1</a> |
| <b>DSD839</b>                      | Negros Oriental     | MW217173         | 03/31/2021    | <a href="https://www.ncbi.nlm.nih.gov/nuccore/MW217173.1">https://www.ncbi.nlm.nih.gov/nuccore/MW217173.1</a> | MW725552         | 07/26/2021    | <a href="https://www.ncbi.nlm.nih.gov/nuccore/MW725552.1">https://www.ncbi.nlm.nih.gov/nuccore/MW725552.1</a> |

| <b><i>Streptomyces</i><br/>Strain Code</b> | <b>Collection Site</b> | <b>16s rRNA</b>         |                      |                                                                                                               | <b>rpoB</b>             |                      |                                                                                                               |
|--------------------------------------------|------------------------|-------------------------|----------------------|---------------------------------------------------------------------------------------------------------------|-------------------------|----------------------|---------------------------------------------------------------------------------------------------------------|
|                                            |                        | <b>Accession number</b> | <b>Date Released</b> | <b>Accession URL</b>                                                                                          | <b>Accession Number</b> | <b>Date Released</b> | <b>Accession URL</b>                                                                                          |
| <b>DSD1328</b>                             | Central Visayas        | MW217074                | 03/31/2021           | <a href="https://www.ncbi.nlm.nih.gov/nuccore/MW217074.1">https://www.ncbi.nlm.nih.gov/nuccore/MW217074.1</a> | MW883334                | 07/26/2021           | <a href="https://www.ncbi.nlm.nih.gov/nuccore/MW883334.1">https://www.ncbi.nlm.nih.gov/nuccore/MW883334.1</a> |
| <b>DSD1342</b>                             | Negros Occidental      | MW217174                | 03/31/2021           | <a href="https://www.ncbi.nlm.nih.gov/nuccore/MW217174.1">https://www.ncbi.nlm.nih.gov/nuccore/MW217174.1</a> | MW725553                | 07/26/2021           | <a href="https://www.ncbi.nlm.nih.gov/nuccore/MW725553.1">https://www.ncbi.nlm.nih.gov/nuccore/MW725553.1</a> |
| <b>DSD1381</b>                             | Negros Occidental      | MW217175                | 03/31/2021           | <a href="https://www.ncbi.nlm.nih.gov/nuccore/MW217175.1">https://www.ncbi.nlm.nih.gov/nuccore/MW217175.1</a> | MW820615                | 07/28/2021           | <a href="https://www.ncbi.nlm.nih.gov/nuccore/MW820615.1">https://www.ncbi.nlm.nih.gov/nuccore/MW820615.1</a> |
| <b>DSD1555</b>                             | Negros Oriental        | MW217091                | 03/31/2021           | <a href="https://www.ncbi.nlm.nih.gov/nuccore/MW217091.1">https://www.ncbi.nlm.nih.gov/nuccore/MW217091.1</a> | MW820617                | 07/28/2021           | <a href="https://www.ncbi.nlm.nih.gov/nuccore/MW820617.1">https://www.ncbi.nlm.nih.gov/nuccore/MW820617.1</a> |
| <b>DSD2625</b>                             | Occidental Mindoro     | MW217080                | 03/31/2021           | <a href="https://www.ncbi.nlm.nih.gov/nuccore/MW217080.1">https://www.ncbi.nlm.nih.gov/nuccore/MW217080.1</a> | MW820616                | 07/28/2021           | <a href="https://www.ncbi.nlm.nih.gov/nuccore/MW820616.1">https://www.ncbi.nlm.nih.gov/nuccore/MW820616.1</a> |
| <b>DSD2987</b>                             | Occidental Mindoro     | MW217096                | 03/31/2021           | <a href="https://www.ncbi.nlm.nih.gov/nuccore/MW217096.1">https://www.ncbi.nlm.nih.gov/nuccore/MW217096.1</a> | MW883335                | 07/26/2021           | <a href="https://www.ncbi.nlm.nih.gov/nuccore/MW883335.1">https://www.ncbi.nlm.nih.gov/nuccore/MW883335.1</a> |
| <b>DSD3011</b>                             | Occidental Mindoro     | MW217087                | 03/31/2021           | <a href="https://www.ncbi.nlm.nih.gov/nuccore/MW217087.1">https://www.ncbi.nlm.nih.gov/nuccore/MW217087.1</a> | MW883336                | 07/26/2021           | <a href="https://www.ncbi.nlm.nih.gov/nuccore/MW883336.1">https://www.ncbi.nlm.nih.gov/nuccore/MW883336.1</a> |
| <b>DSD3018</b>                             | Occidental Mindoro     | MW217095                | 03/31/2021           | <a href="https://www.ncbi.nlm.nih.gov/nuccore/1928656556">https://www.ncbi.nlm.nih.gov/nuccore/1928656556</a> | MW753179                | 08/01/2021           | <a href="https://www.ncbi.nlm.nih.gov/nuccore/MW753179">https://www.ncbi.nlm.nih.gov/nuccore/MW753179</a>     |
| <b>DSD977</b>                              | Western Antique        | MW217188                | 03/31/2021           | <a href="https://www.ncbi.nlm.nih.gov/nuccore/MW217188.1">https://www.ncbi.nlm.nih.gov/nuccore/MW217188.1</a> | MW693207                | 07/26/2021           | <a href="https://www.ncbi.nlm.nih.gov/nuccore/MW693207.1">https://www.ncbi.nlm.nih.gov/nuccore/MW693207.1</a> |
| <b>DSD742</b>                              | Western Antique        | MW048781.1              | 03/31/2021           | <a href="https://www.ncbi.nlm.nih.gov/nuccore/MW693206.1">https://www.ncbi.nlm.nih.gov/nuccore/MW693206.1</a> | MW693206                | 07/26/2021           | <a href="https://www.ncbi.nlm.nih.gov/nuccore/MW693206.1">https://www.ncbi.nlm.nih.gov/nuccore/MW693206.1</a> |

| <i>Streptomyces</i><br>Strain Code | Collection Site  | 16s rRNA         |               |                                                                                                               | rpoB             |               |                                                                                                               |
|------------------------------------|------------------|------------------|---------------|---------------------------------------------------------------------------------------------------------------|------------------|---------------|---------------------------------------------------------------------------------------------------------------|
|                                    |                  | Accession number | Date Released | Accession URL                                                                                                 | Accession Number | Date Released | Accession URL                                                                                                 |
| <b>DSD1006</b>                     | Tubbataha Reefs  | MW116661.1       | 03/31/2021    | <a href="https://www.ncbi.nlm.nih.gov/nuccore/MW602150.1">https://www.ncbi.nlm.nih.gov/nuccore/MW602150.1</a> | MW602150         | 07/26/2021    | <a href="https://www.ncbi.nlm.nih.gov/nuccore/MW116729.1">https://www.ncbi.nlm.nih.gov/nuccore/MW116729.1</a> |
| <b>DSD3025</b>                     | Northern Antique | MW116729.1       | 03/31/2021    | <a href="https://www.ncbi.nlm.nih.gov/nuccore/MW116661.1">https://www.ncbi.nlm.nih.gov/nuccore/MW116661.1</a> | MW246168         | 07/26/2021    | <a href="https://www.ncbi.nlm.nih.gov/nuccore/MW246168.1">https://www.ncbi.nlm.nih.gov/nuccore/MW246168.1</a> |

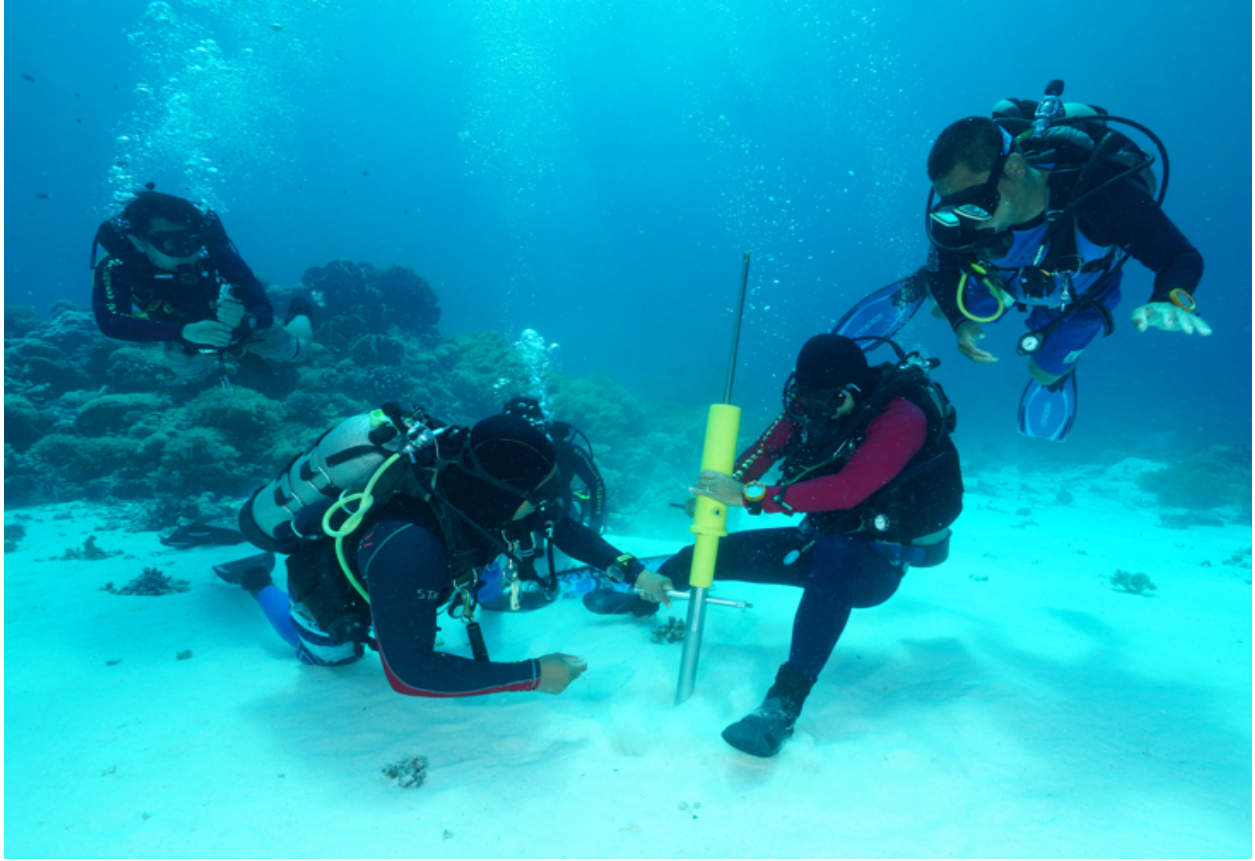

**Supplementary Figure S1.** Sediment Core Sampling Using a Fabricated 1-Meter Sediment Core Sampler. Marine sediments were collected by manually inserting the piston to the seabed for the core barrel to penetrate through hammering strokes.



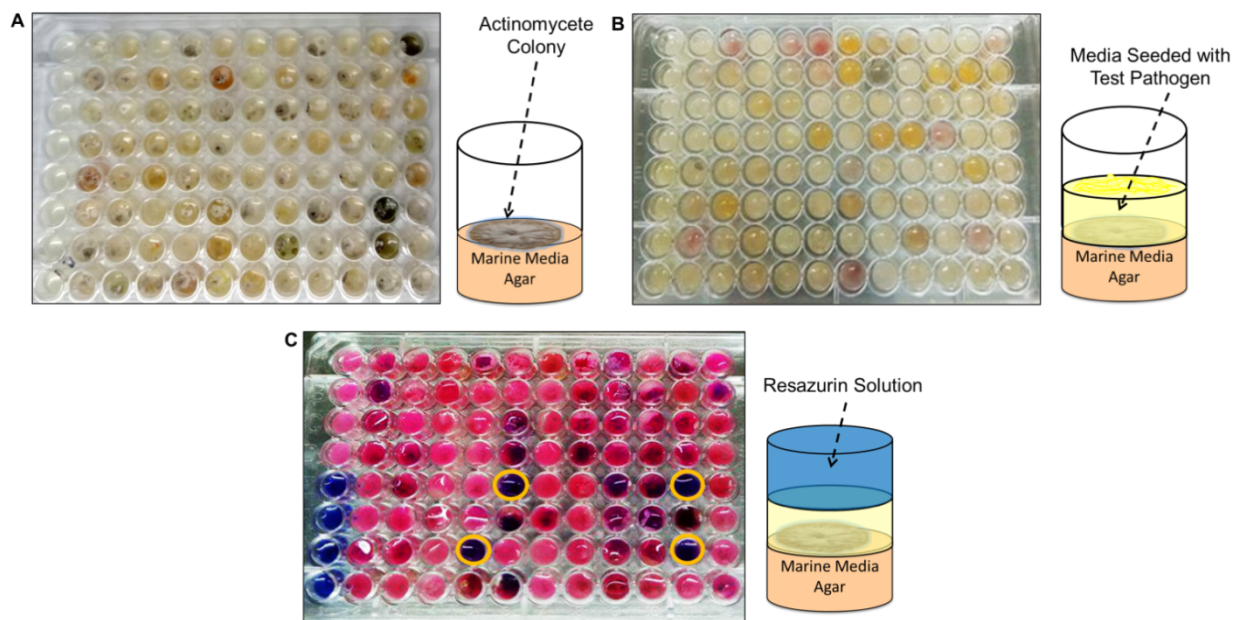

**Supplementary Figure S2.** Initial Antibacterial Testing of Live Cells of Actinomycete Strains Overlaid with Bacterial Suspension of Test Pathogens. **A)** 96-well plate containing marine medium agar inoculated with actinomycete. **B)** Bacterial suspension of the test pathogen was overlaid on top of the marine medium agar with actinomycete after 14 days of incubation. **C)** After 24 h of incubation at 37°C, 20 µL resazurin dye (0.2 mg/mL in PBS) was added to each well. After 10-20 min of incubation at room temperature, retained blue color of resazurin as shown by the encircled wells indicated an antibacterial activity, while the pink color signified reduction of resazurin to resorufin, indicating inactivity against test pathogen.

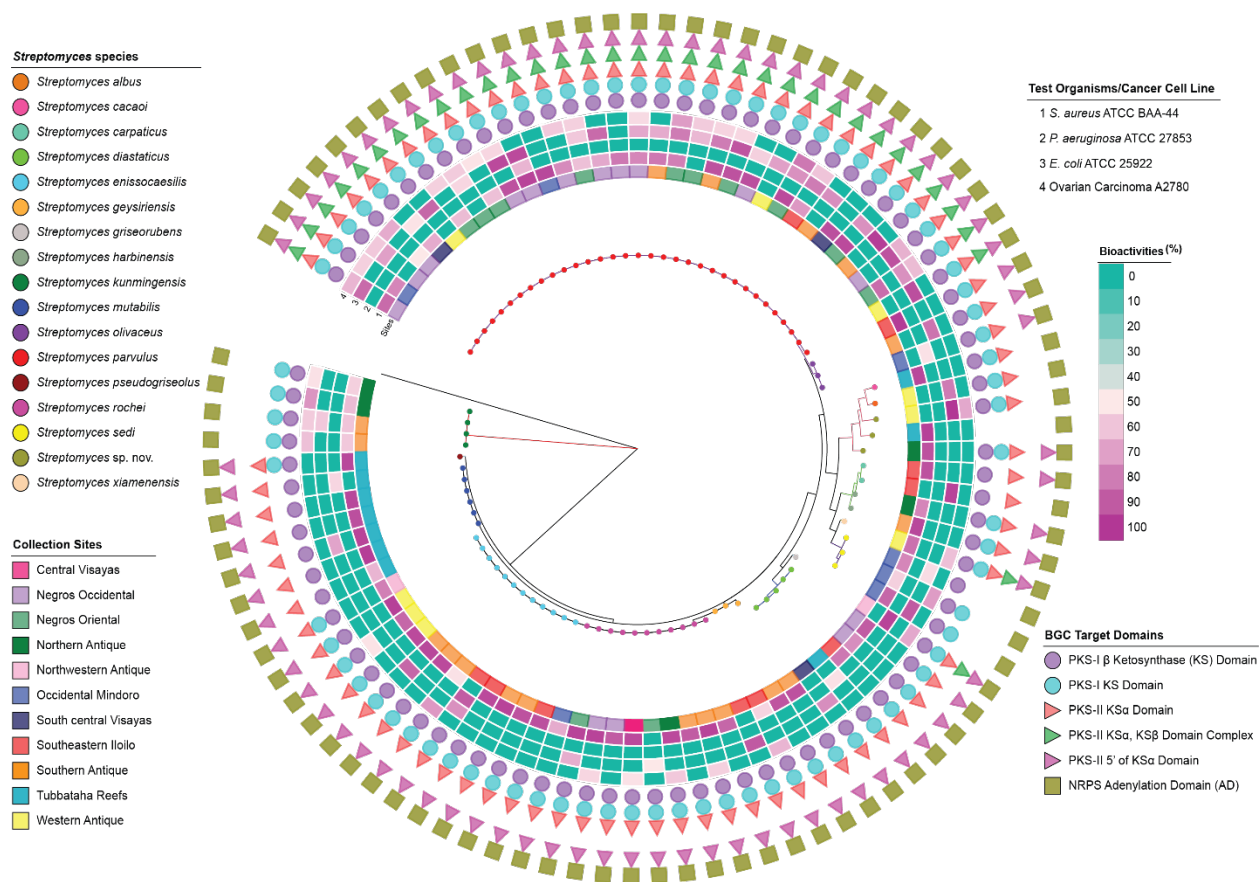

**Supplementary Figure S3.** Representative Distribution of Active *Streptomyces* in Philippine Sampling Sites Based on the 16S rRNA Gene Sequences, and their Detected BGCs in Real Time-PCR. The phylogenetic tree of *Streptomyces* was constructed using 16S rRNA gene sequences. Different species were represented by colored circles in the tree. Clusters indicated by colored nodes in the tree were selected based on  $\geq 90\%$  bootstrap replicates. The collection sites of strains were annotated by the color strips adjacent to the tree. Detected BGCs using PKS and NRPS primer sets were represented by the colored squares, circles, and triangles. Heat map in the outermost portion of tree displayed the antibacterial and anticancer activities of strains against the four test pathogens and ovarian cancer cell line (A2780). Color gradient ranging from purple (90-100% activity) to blue-green (no activity) corresponds to the bioactivities of strains. The phylogenetic tree was generated with maximum-likelihood algorithms using mega 7.0 (1000 bootstrap replications) and the substitution model Tamura–Nei method. The tree is drawn to scale, with branch lengths in the same units as those of the evolutionary distances used to infer the phylogenetic tree. The tree was visualized and annotated using interactive tree of life (iTOL v4 5.6.3 (Biobyte solutions, Heidelberg, Germany)).

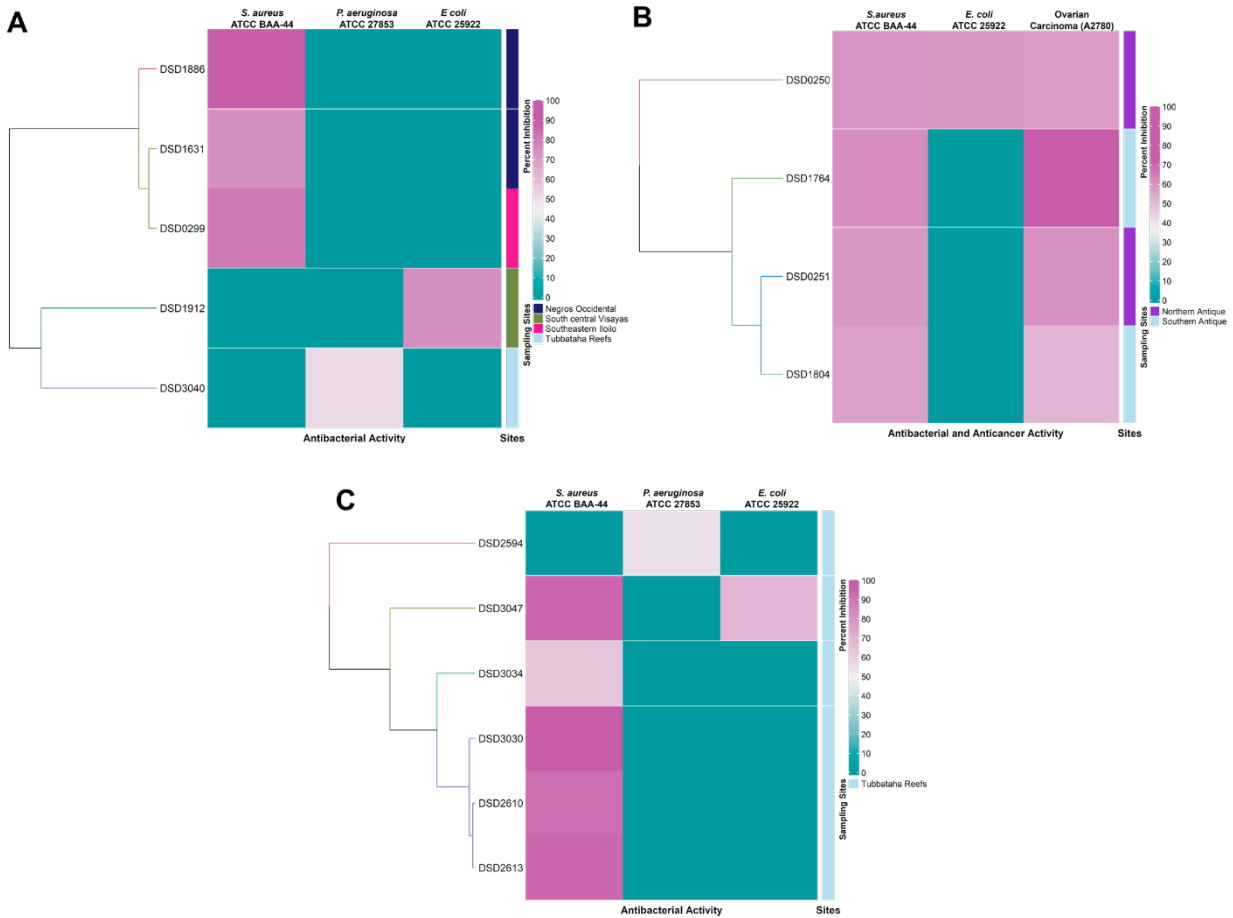

**Supplementary Figure S4.** Heat Map Based on the Antibacterial and Anticancer Activity of other *Streptomyces* species **(A) *S. diastaticus***, **(B) *S. kunmingensis***, and **(C) *S. mutabilis***, against **4 test pathogens: *S. aureus* ATCC BAA-44, *E. coli* ATCC 25922, *P. aeruginosa* ATCC 27853, *E. aerogenes* ATCC 13048.** Other *Streptomyces* species have shown strains belonging to the same species, found in the same site **(C)** or in different sites **(A)** and **(B)**, have variations in their antibacterial and anticancer activity. Strains belonging to the species *S. diastaticus* and *S. mutabilis* have not exhibited anticancer activity against ovarian carcinoma (A2780). Dendrogram on the left of the diagram indicate the relatedness of the strains based on the antibacterial and anticancer activities. Antibacterial and anticancer activity values range from 0-100% and correspond to a gradient of color steps ranging from blue-green (0%), white (50%), and purple (100%). Sampling sites are indicated by names and colors on the right side of the diagram. The heat map was created using the Rstudio statistical program ver1.2.5042 with heat map clustering methods, hierarchical clustering using a Euclidean distance metric to cluster the data.

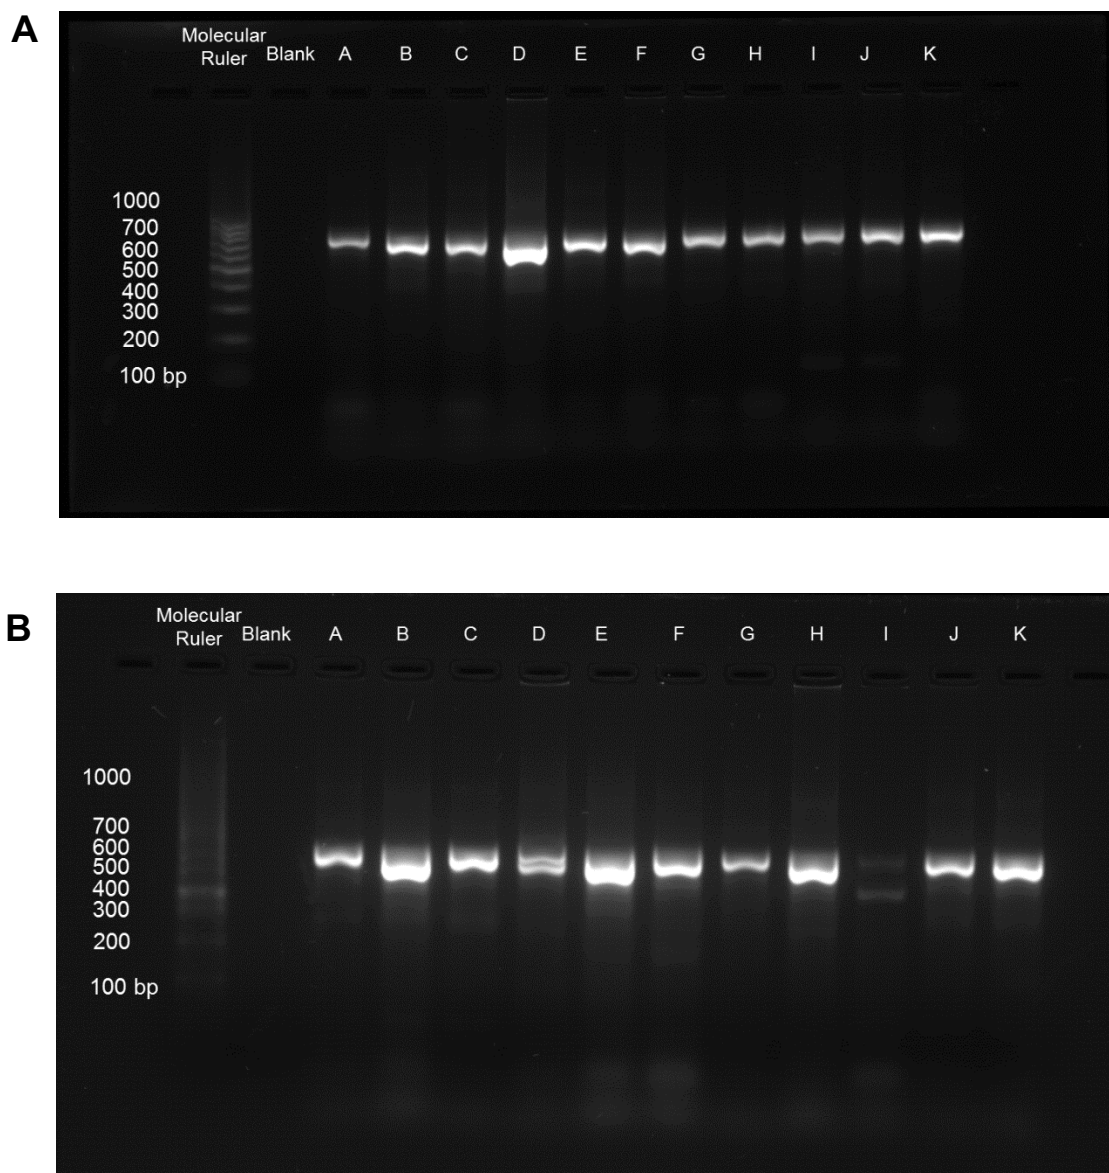

**Supplementary Figure S5.** Agarose Gel Electrophoresis of the NRPS Amplicons in *Streptomyces* sp. Strains (**A-B**). Distinct band at 600-700 bp confirmed the presence of NRPS gene. Visualized using 2% agarose gel in 90V. **A)** Lanes A-K (A: *Streptomyces parvulus* strain DSD1632, B : *S. parvulus* strain DSD988, C: *S. parvulus* strain DSD1628, D: *S. parvulus* strain DSD154, E: *S. parvulus* strain DSD992, F: *S. parvulus* strain DSD1641, G: *S. mutabilis* strain DSD3034, H: *S. mutabilis* strain DSD3030, I: *S. sedi* strain DSD2987, J: *S. sedi* strain DSD3011, K: *S. diastaticus* strain DSD299). **B)** Lanes A-K (A: *Streptomyces ennisocaesilis* strain DSD318, B: *S. ennisocaesilis* strain DSD357, C: *S. olivaceus* strain DSD264, D: *S. pseudogriseolus* strain DSD2603, E: *S. cacaoi* strain DSD2595, F: *Streptomyces* sp. DSD3025, G: *S. kunmingensis* strain DSD250, H: *S. xiamenensis* strain DSD977, I: *S. harbinensis* strain DSD757, J: *S. rochei* strain DSD839, and K: *S. rochei* strain DSD2625).

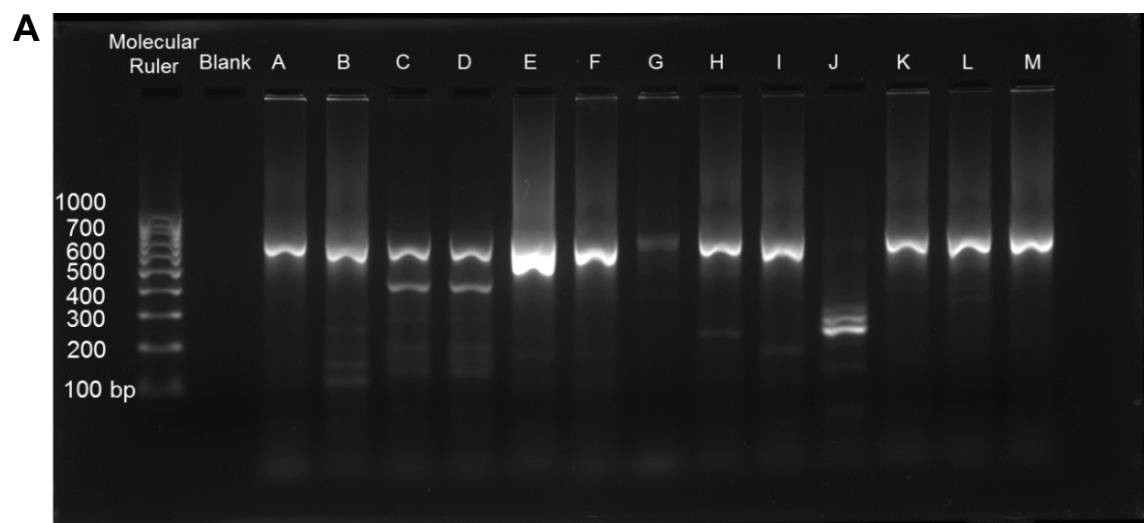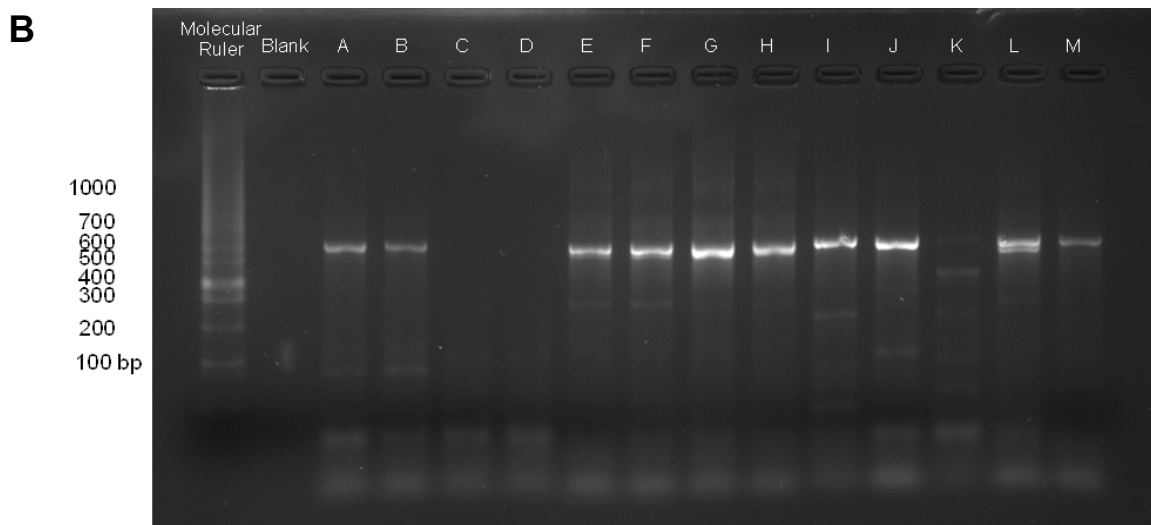

**Supplementary Figure S6.** Agarose Gel Electrophoresis of the PKS-I Amplicons of *Streptomyces* sp. Strains. Two sets of primers were used to amplify the  $\beta$ -ketoacyl synthetase domain of PKS-I. Fragments of 600-700 bp of PKS-I amplified by **A)** K SMA-F and K SMB-R primers. Lanes A-M (A: *Streptomyces parvulus* strain DSD993, B: *S. parvulus* strain DSD1628, C: *S. mutabilis* strain DSD3047, D: *S. mutabilis* strain DSD2613, E: *S. ennisocaesilis* strain DSD360, F: *S. ennisocaesilis* strain DSD357, G: *S. rochei* strain DSD1342, H: *S. rochei* strain DSD1328, I: *S. xiamenensis* strain DSD977, J: *S. diastaticus* strain DSD299, K: *Streptomyces* sp. DSD3025, L: *Streptomyces* sp. DSD742, M: *Streptomyces* sp. DSD1006). **B)** K S-F and K S-R primers. Lanes A-M (A: *Streptomyces parvulus* strain DSD1639, B: *S. parvulus* strain DSD985, C:- *S. mutabilis* strain DSD2610, D: *S. mutabilis* strain DSD3030, E: *S. rochei* strain DSD120, F: *S. ennisocaesilis* strain DSD318, G: *S. sedi* strain DSD3011, H: *S. pseudogriseolus* strain DSD2603, I: *S. geysiriensis* strain DSD476, J: *Streptomyces* sp. DSD3025, K: *Streptomyces* sp. DSD742, L: *S. albus* strain DSD1715, M: *S. kunmingensis* strain DSD1764). Gels were visualized using 2% agarose gel in 90V.

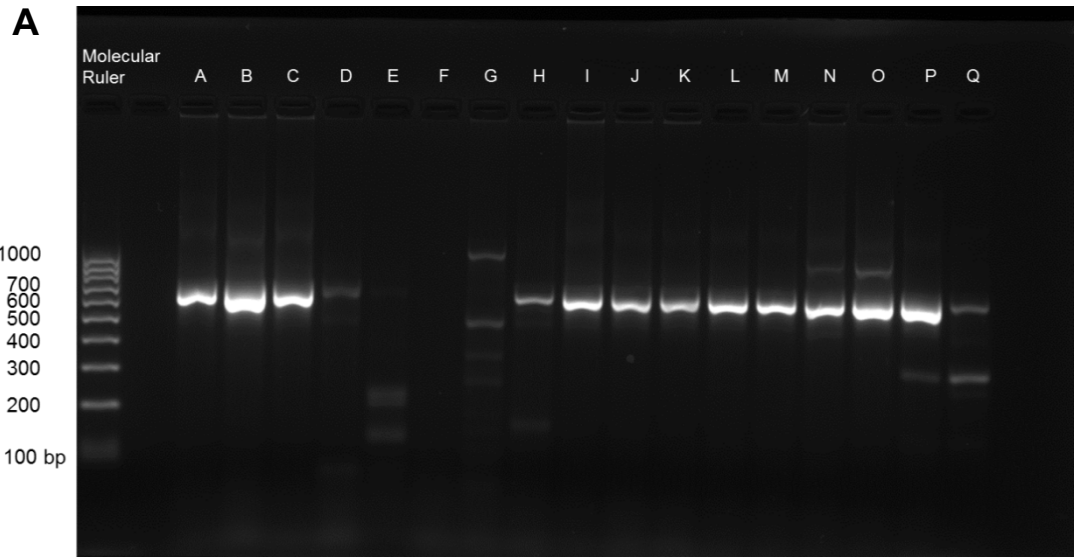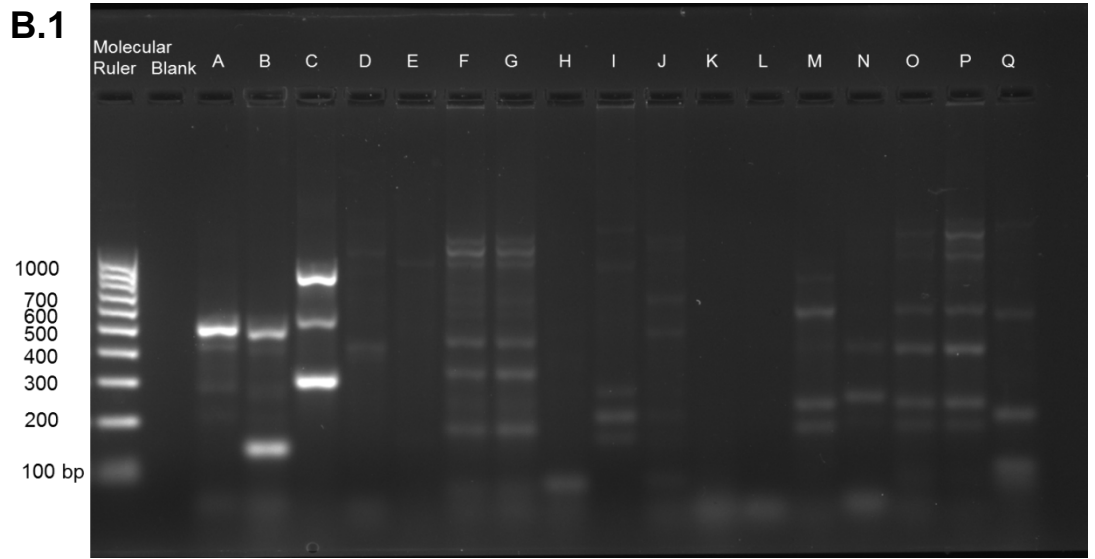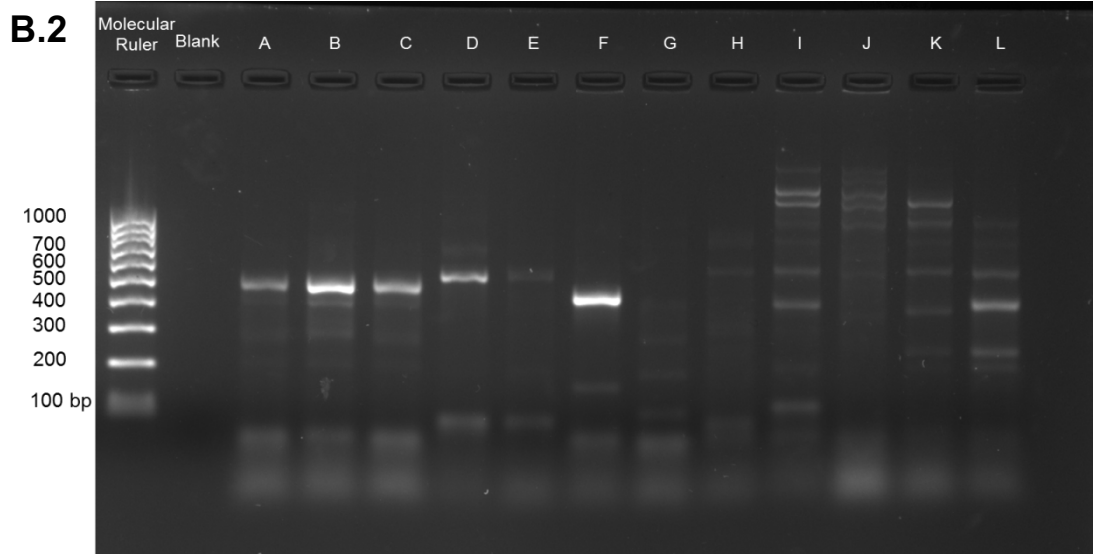

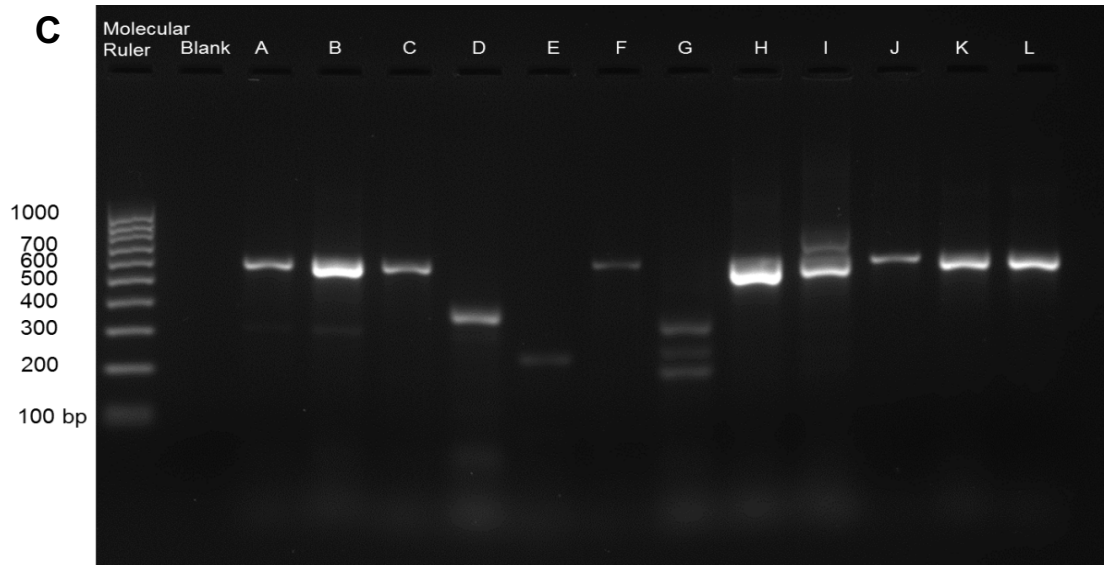

**Supplementary Figure S7.** Agarose Gel Electrophoresis of the PKS-II amplicons of *Streptomyces* sp. Strains. Three sets of primers were used to amplify type II PKS. **A)** KS1-F, KS1-R primers were used to target the ketosynthase  $\alpha$  domain. Band size of 600 bp was observed. Lanes A-Q (A: *Streptomyces parvulus* strain DSD1629, B: *S. parvulus* strain DSD1643, C: *S. parvulus* strain DSD1642, D: *S. albus* strain DSD1715, E: *S. sedi* strain DSD3018, F: *S. sedi* strain DSD2987, G: *Streptomyces* sp. strain DSD3025, H: *S. xiamenensis* strain DSD977, I: *S. diastaticus* strain DSD1631, J: *S. mutabilis* strain DSD2613, K: *S. mutabilis* strain DSD2610, L: *S. geysiriensis* strain DSD176, M: *S. olivaceus* strain DSD618, N: *S. rochei* strain DSD1342, O: *S. rochei* strain DSD1555, P: *S. carpaticus* strain DSD331, Q: *S. carpaticus* strain DSD274). **B)** KS- $\alpha$ , KS- $\beta$  targets ketosynthase (KS)  $\alpha$  and KS $\beta$  domains which is indicated by a distinct band at 400-500 bp. **B.1)** Lanes A- Q (A: *Streptomyces parvulus* strain DSD988, B: *S. parvulus* strain DSD1072, C: *S. xiamenensis* strain DSD977, D: *S. sedi* strain DSD3018, E: *Streptomyces* sp. strain DSD1006, F: *S. diastaticus* strain DSD1886, G: *S. diastaticus* strain DSD1631, H: *S. diastaticus* strain DSD299, I: *Streptomyces* sp. strain DSD742, J: *S. albus* strain DSD1715, K: *S. mutabilis* strain DSD2610, L: *S. geysiriensis* strain DSD342, M: *S. enissocaesilis* strain DSD360, N: *S. enissocaesilis* strain DS1986, O: *S. rochei* strain DSD1328, P: *S. rochei* strain DSD1381, Q: *S. harbinensis* strain DSD757). **B.2)** A: *Streptomyces parvulus* strain DSD1628, B: *S. parvulus* strain DSD1641, C: *S. parvulus* strain DSD1690, D: *S. carpaticus* strain DSD331, E: *S. carpaticus* strain DSD274, F: *S. griseorubens* strain DSD767, G: *S. pseudogriseolus* strain DSD2603, H: *S. mutabilis* strain DSD3030, I: *S. enissocaesilis* strain DSD133, J: *S. enissocaesilis* strain DSD165, K: *S. rochei* strain DSD243, L: *S. rochei* strain DSD2625. **C)** Gene fragment at 554 bp indicates presence of 5' KS $\alpha$  domain of PKS-II. Lanes A-L (A: *Streptomyces parvulus* strain DSD1637, B: *S. parvulus* strain DSD1629, C: *S. xiamenensis* strain DSD977, D: *Streptomyces* sp. strain DSD3025, E: *S. albus* strain DSD1715, F: *Streptomyces* sp. strain DSD1006, G: *S. kunmingensis* strain DSD1764, H: *S. olivaceus* strain DSD618, I: *S. diastaticus* strain DSD1886, J: *S. mutabilis* strain DSD3034, K: *S. enissocaesilis* strain DSD323, L: *S. rochei* strain DSD2625. Unspecific, multiple bands were considered negative. Visualized using 2% agarose gel in 90V.
